1 **Title: Using structural analysis *in silico* to assess the impact of missense variants in MEN1**

2

3 **Authors:** Richard C. Caswell (1), Martina M. Owens (2), Adam C. Gunning (1), Sian Ellard (2) &

4 Caroline F. Wright (1).

5

6 **Author affiliations:** 1: Institute of Biomedical and Clinical Science, College of Medicine & Health,

7 University of Exeter, Exeter, United Kingdom. 2: Department of Molecular Genetics, Royal Devon &

8 Exeter NHS Foundation Trust, Exeter, United Kingdom.

9

10 **Short title:** *In silico* structural analysis of *MEN1* variants

11 **Key words:** Multiple Endocrine Neoplasia type 1; protein structure; missense variant interpretation;

12 genomics

13

14 **Corresponding author** (to whom reprint requests should be addressed): Richard C Caswell; email:

15 [r.caswell@exeter.ac.uk](mailto:r.caswell@exeter.ac.uk); tel: +44 1392 408506

16

17 **Financial support:** This work was supported by the Wellcome Trust (grant no. 200990).

18

19 **Disclosure statement:** All authors declare that they have no competing interests.

20

21 **ABSTRACT**

22 Despite the rapid expansion in recent years of databases reporting either benign or pathogenic  
23 genetic variation, the interpretation of novel missense variants can remain challenging, particularly  
24 for clinical or genetic testing laboratories where functional analysis is often unfeasible. Previous  
25 studies have shown that thermodynamic analysis of protein structure *in silico* can discriminate  
26 between groups of benign and pathogenic missense variants. However, although structures exist for  
27 many human disease-associated proteins, such analysis remains largely unexploited in clinical  
28 laboratories. Here, we analysed the predicted effect of 338 known missense variants on the  
29 structure of Menin, the *MEN1* gene product. Results provided strong discrimination between  
30 pathogenic and benign variants, with a threshold of >4 kcal/mol for the predicted change in stability  
31 providing a strong indicator of pathogenicity. Subsequent analysis of 7 novel missense variants  
32 identified during clinical testing of MEN1 patients showed that all 7 were predicted to destabilise  
33 Menin by >4 kcal/mol. We conclude that structural analysis provides a useful tool in understanding  
34 the impact of missense variants in *MEN1*, and that integration of proteomic with genomic data could  
35 potentially contribute to the classification of novel variants in this disease.

36

## 37 INTRODUCTION

38 The rapid expansion in recent years of genomic data from both patient and control groups has vastly  
39 improved the quantity and quality of information that is available to clinicians in attempting to  
40 classify novel genetic variants. While it is often straightforward to interpret likely loss-of-function  
41 variants such as stop-gain or frameshift variants, the same is not true of missense variants, where  
42 the effect of an amino acid substitution is likely to be specific to its context in the protein of interest.  
43 Moreover, such variants are often rare or unique, and thus must be interpreted on a case-by-case  
44 basis.

45

46 Numerous methods have been developed for predicting the phenotypic effect of missense variants.

47 As has been comprehensively reviewed elsewhere (1), these methods rely either on analysis of DNA

48 and protein conservation, protein structure-based analysis, or a combination of the two. In the case

49 of the latter, widely used tools such as PolyPhen are able to incorporate information on the nature

50 of the amino acid change itself (e.g. Grantham distance between native and variant amino acids,

51 changes in polarity or charge), effects on predicted secondary structure and, where available, data

52 derived from the structural context, such as changes in hydrogen bonding or atomic crowding.

53 However, such data is used in a qualitative, rule-based manner in the final prediction (1), and the

54 tools which are most widely used in the clinical setting do not specifically address the quantitative

55 effects of missense variants on protein stability. Nevertheless, these effects can be calculated where

56 there is an experimental or modeled 3D structure for the protein of interest, and programs such as

57 FoldX (2), Rosetta (3, 4) or other computational methods have been widely used by structural

58 biologists to investigate the effects of missense variants on protein folding and stability (5, 6).

59 Despite this, few studies have sought to address whether there is a direct clinical application of such

60 an approach, i.e. whether pathogenic and benign variants can be distinguished on the basis of their

61 predicted effects on thermodynamic stability.

62

63 The potential utility of protein stability data towards the analysis of missense variants has recently  
64 been demonstrated in studies of the Lynch syndrome protein, MSH2 (7), and in phenylalanine  
65 hydroxylase (PAH) (8), in which pathogenic variants result in phenylketonuria. Both these studies  
66 combined *in silico* analysis with extensive functional analysis of a number of *MSH2* and *PAH* variants;  
67 however, resources for the latter are unlikely to be routinely available in clinical genetics  
68 laboratories. We have therefore asked whether *in silico* analysis, based predominantly on the  
69 predicted effects of missense variants on protein stability, can help discriminate between pathogenic  
70 and benign variation in the context of clinical testing of the *MEN1* gene.

71

72 Pathogenic variants in the *MEN1* gene cause Multiple Endocrine Neoplasia type I, an autosomal  
73 dominant disorder, in which patients develop neoplastic lesions in various endocrine tissues,  
74 principally the parathyroids, pituitary and pancreas (9). Pathogenic variants may either be inherited  
75 or acquired, but in both cases development of disease requires loss of heterozygosity consistent  
76 with a role for the *MEN1* gene product as a tumor suppressor. The most common presenting feature  
77 of *MEN1* is hyperparathyroidism, which occurs in ~95% of patients due to tumors of the parathyroid  
78 gland; however, tumors are also frequently observed in the pancreatic islets (40-70%) and pituitary  
79 (30-40%) (10). Patients may also develop tumors of the adrenal cortex, carcinoid tumors and non-  
80 endocrine tumors, including lipomas, angiofibromas, collagenomas and meningiomas (11), resulting  
81 in a range of clinical symptoms which may overlap with other diseases of different genetic etiology  
82 (12-14). This overlap presents one of the key problems in assessing genetic variants in cases of  
83 *MEN1*. While a large number of pathogenic variants in *MEN1* have been reported, genetic testing  
84 continues to uncover novel missense substitutions which require assessment of their potential  
85 pathogenicity. A further confounding issue is the often later onset of disease, with reported age-  
86 related penetrance of 10-43% at 20 years and 81- 94% by 50 years (10, 15), which may lead to  
87 apparent non-segregation of a variant with disease within a family pedigree.

88

89 The identification of a genetic etiology has important implications for the patient and for their family  
90 members. With the exception of pituitary neuroendocrine tumors, MEN1-associated tumors are  
91 usually multiple and treatment is therefore challenging, requiring a multi-disciplinary team of  
92 experts to reduce morbidity and mortality (16). The identification of the familial disease-causing  
93 variant enables the identification of carriers when they are still asymptomatic. Clinical surveillance in  
94 these individuals allows early recognition of the clinical manifestations and therapeutic intervention.  
95 For example, primary hyperparathyroidism often remains asymptomatic in many patients but  
96 prolonged hypercalcemia usually results in bone loss and/or nephrocalcinosis (17).

97

98 Approximately 20% of the variants identified in the *MEN1* gene are missense variants (18). The  
99 standards and guidelines published by the American College of Medical Genetics and Genomics  
100 (ACMG) and the Association for Molecular Pathology (AMP) describe a framework for the  
101 classification of sequence variants (19). Adjustments to this framework for the interpretation of  
102 *MEN1* missense variants has been proposed (20). However both agree that variants of uncertain  
103 significance should not be used to guide the clinical management of patients. This could lead to an  
104 under-diagnosis of MEN1 and a lost opportunity for screening at-risk relatives. For these reasons,  
105 methods to assist the classification of variants in *MEN1* would be of clinical value. The availability of  
106 a number of experimental structures for Menin, the *MEN1* gene product, raises the possibility that  
107 structural analysis may provide such clinical utility.

108

109 We report here that thermodynamic analysis of *MEN1* variants *in silico* provides a very strong  
110 positive predictive value for pathogenicity, thereby helping to assess the impact of novel missense  
111 variants on protein function and potentially allowing its use as an aid to variant classification, and  
112 discuss briefly the scope for wider application of this approach to other diseases.

113

114

## 115 MATERIALS & METHODS

116 **Variant groups, transcripts and numbering.** Previously-reported missense SNVs in *MEN1* were  
117 downloaded from the Human Gene Mutation Database, Professional version (HGMD Pro) (21), the  
118 Genome Aggregation Database (gnomAD) (22) and the Sydney Genomics Collaborative Database  
119 (SGCD) (23). For the purposes of this analysis, variants were divided into groups as follows:  
120 pathogenic: DM ('disease mutation') class variants reported in HGMD Pro but not in gnomAD or  
121 SGCD (n=162); benign: variants reported in gnomAD or SGCD but not as DM class in HGMD Pro  
122 (n=206); uncertain: variants reported as DM in HGMD Pro and present in gnomAD and/or SGCD  
123 (n=14). Different nucleotide substitutions resulting in the same coding change were regarded as a  
124 single missense substitution. In addition to these previously-reported variants, analysis was  
125 performed on seven novel missense variants: H46P; A164P; L175P; A345P; I360F; F364S; and G419D  
126 (see Table 1 for details). These variants were identified in our laboratory as part of the NHS (England)  
127 Genetic Testing service for rare inherited diseases. The patients tested fulfilled the criteria for a  
128 clinical diagnosis of MEN1 (10), presenting with at least two out of the three main MEN1-associated  
129 endocrine lesions or one typical MEN1-associated tumour and a first-degree relative with MEN1 or  
130 MEN1-associated lesion at a young age. For patients with a family history, the relevant variants  
131 (H46P, A164P, I360F and F364S) were all shown to co-segregate with disease in the family.  
132  
133 Menin, the protein product of the *MEN1* gene, occurs in two major isoforms of 615 or 610 amino  
134 acids, which arise by use of alternative splice donor sites in exon 1 such that the shorter isoform  
135 lacks residues 149-153 of the longer. While gnomAD and SGCD variants are annotated according to  
136 the 615-residue isoform encoded by transcripts NM\_130803/ENST00000337652, HGMD Pro and  
137 structural databases use the 610-residue isoform encoded by NM\_130799/ENST00000312049 as  
138 default. All numbering in this manuscript refers to the 610-residue form of Menin, and variants from  
139 gnomAD and SGCD have been re-annotated accordingly.

140

141 **Protein structures.** Structures of human Menin were downloaded as PDB files from the worldwide  
142 Protein Data Bank (24); a full list of the 29 crystal structures, containing 31 discrete Menin chains,  
143 used in this analysis is shown in Table 2. Any non-native amino acids (e.g. affinity purification tags) in  
144 these structures were removed from PDB files prior to further analysis.

145

146 ***In silico* mutagenesis and thermodynamic analysis.** Prior to *in silico* mutagenesis, sidechain repair  
147 and energy minimization was performed on all 31 Menin chains in isolation, using the RepairPDB  
148 function of the FoldX modeling suite, version 4 (33). The FoldX BuildModel function was then used to  
149 introduce individual substitutions into each of the repaired PDB structures. Of the 389 unique  
150 missense variants, 338 were covered by at least one PDB structure (pathogenic, n=161; benign,  
151 n=161; uncertain, n=9; novel, n=7). For each substitution, FoldX reported a change in free energy  
152 ( $\Delta\Delta G$ ) resulting from the substitution; from this, an average  $\Delta\Delta G$  value was calculated for each  
153 variant across all structures containing the relevant position. In total, all 31 structures were used for  
154 308/338 variants (mean for all variants = 29), whereas due to differences in coverage of individual  
155 PDB files, analysis was possible using only a single structure for 7 variants. A full list of variants, the  
156 number of PDB structures analysed for each and average  $\Delta\Delta G$  values for each variant is shown in  
157 Table 3. All structures were visualized in PyMOL (34).

158

159 **Calculation of solvent accessibility.** The absolute area accessible to solvent (ASA) was calculated on  
160 a residue-by-residue basis for 7 representative structures of Menin using DSSP (35, 36) version 3.0.0  
161 (37). After calculating an average ASA value for each residue, relative solvent accessibility (RSA) was  
162 derived using the theoretical scale described by Tien et al. (38). A list of structures used for DSSP  
163 analysis is included in Table 2.

164

165

166

167 **RESULTS**

168 ***Pathogenic variants in MEN1 are predicted to be destabilizing.*** Over 30 crystal structures have  
169 previously been reported for Menin (e.g. Figure 1A); most of these contain the protein in isolation or  
170 bound to a small (drug) ligand, while others show Menin in complex with peptides from JunD,  
171 KMT2A or PSIP (Figure 1B; Table 2). Although all structures have been derived from expression of  
172 full-length (or near full-length) Menin, a number of regions remain unresolved in crystal structures.  
173 These regions predominantly lie in the C-terminal of the protein and correspond to stretches of  
174 predicted intrinsic disorder (39) in the protein (Figure 1C, D), presumably resulting in high mobility  
175 within crystals. Interestingly, while these regions contain a similar distribution of benign variants as  
176 that seen in the protein as a whole, pathogenic variants are rare in regions of predicted disorder  
177 (Figure 1D); however, we cannot rule out the possibility that the lack of pathogenic variants in  
178 disordered regions is due to reporting bias towards variants which lie close to those already known.  
179 As a result of this distribution of pathogenic variants almost entirely within ordered regions, the vast  
180 majority (161/162) are covered by one or more PDB entries and are thus amenable to structural  
181 analysis.

182

183 The overall structure of Menin is highly comparable within all reported PDB structures (alignment to  
184 PDB 6b41 yields an average root-mean-square deviation, RMSD, of 0.65 Å; range 0.55-1.10 Å).  
185 Moreover, there is no significant effect of ligand binding on Menin structure (Figure 2). Since  
186 different PDB files contain slightly different numbers of amino acids but there are no obvious  
187 structural outliers, all available structures were used for thermodynamic analysis of missense  
188 variants *in silico* using FoldX.

189

190 Variant groups were highly distinguishable by their predicted effect on thermodynamic stability, as  
191 represented by average  $\Delta\Delta G$  value calculated across all structures, with most putatively benign  
192 (gnomAD and SGCD) variants having little or no effect (average  $\Delta\Delta G$  for all variants, 1.13 kcal/mol;



193 SD, 1.46 kcal/mol), whereas pathogenic (HGMD only) variants were predicted to be strongly  
194 destabilizing (average  $\Delta\Delta G$ , 5.06 kcal/mol; SD 4.25 kcal/mol) (Figure 3A). Notably, the seven novel  
195 missense variants were also predicted to be strongly destabilising (average  $\Delta\Delta G$ , 7.67 kcal/mol; SD  
196 3.14 kcal/mol). Analysis of  $\Delta\Delta G$  values for individual PDB structures showed a similar separation of  
197 putative benign and pathogenic variant groups, with the vast majority of variants falling into a  
198 similar range for all structures (Figure 3B). We further compared the effect at multi-allelic sites  
199 where different benign and pathogenic missense variants occur at the same position. Analysis of 27  
200 benign and 23 pathogenic variants co-occurring at 22 residues again showed that the difference  
201 between the two groups was highly significant ( $p = 0.0002$ ), and that pathogenic missense changes  
202 were more strongly destabilizing than benign ones at the same position (average  $\Delta\Delta G$  value by  
203 group = 6.81 kcal/mol and 2.18 kcal/mol respectively) (Figure 3C).

204

205 If variants which destabilize Menin structure do indeed have a greater tendency to be pathogenic, it  
206 might be expected that variants most frequently observed in the general population would have the  
207 least destabilizing effect. This appears to be the case, as variants with the highest population  
208 frequency had average predicted  $\Delta\Delta G$  values in the range -1 to +1 (Figure 4); as the error in FoldX  
209 calculations is approximately  $\pm 0.8$  kcal/mol (2), this suggests little or no effect of these variants on  
210 protein stability. Notably, those variants which have also been observed in an aging healthy  
211 population, as represented by the SGCD cohort (median age, 80-85 years) and are therefore most  
212 likely to be truly benign, all occur within this range of  $\Delta\Delta G$  values. This group includes the only  
213 commonly-occurring missense *MEN1* variant, R171Q, which has an average  $\Delta\Delta G$  value of 0.15  
214 kcal/mol. Conversely, we note that some variants reported in gnomAD have  $\Delta\Delta G$  values  $>4$  kcal/mol,  
215 and in fact 2/9 of these variants (S38P, D315Y) have also been reported as disease-causing in HGMD  
216 Pro. This may reflect the confounding effect of late onset of symptoms in *MEN1* on apparent  
217 constraint against coding variation, whereby some variants reported in gnomAD may in fact lead to  
218 disease in later life.

219

220 ***Most pathogenic variants are buried in the Menin structure.*** To examine whether there are  
221 differences in the spatial distribution of benign and pathogenic variants, we calculated the relative  
222 solvent accessibility (RSA) of wild-type residues at all positions of missense substitutions (Table 3).  
223 This showed that while positions of benign variants are distributed throughout the volume of the  
224 protein, 86.3% of pathogenic variants occur in solvent-inaccessible (i.e. buried) regions of RSA <0.2  
225 (Figure 5A). Notably, this is also true for the 7 novel variants, 6 of which had an RSA value <0.02.  
226 Plotting RSA against  $\Delta\Delta G$  showed that variants at buried positions were also likely to be the most  
227 strongly destabilizing to protein structure (Figure 5B). Nevertheless, we observed that a significant  
228 number of pathogenic variants exhibited both accessibility to solvent (RSA>0.2) and relatively low  
229  $\Delta\Delta G$ . Mapping the positions of solvent-accessible variants onto the surface of Menin showed that,  
230 as for distribution throughout the internal volume of the protein, benign variants tended to be  
231 distributed across the surface. In contrast, pathogenic variants appeared to occur in clusters, one of  
232 which corresponds to binding surfaces for JunD, KMT2A and PSIP (Figure 5C, D), while another  
233 occurs on the opposite surface of Menin to the JunD binding pocket. It is possible therefore that the  
234 latter region represents the site of an as-yet uncharacterized functional interaction of Menin. As  
235 described above, 6/7 novel missense variants occur at positions which are buried in the interior of  
236 the protein, whereas the only solvent-accessible variant, H46A, occurs at the interface with KMT2A  
237 and presumably acts to impair this interaction (Figure 5E).

238

239 To investigate the effects of protein interactions on the thermodynamic effects of *MEN1* variants  
240 further, we compared  $\Delta\Delta G$  values for variants in PDB structure 3u88 (Menin complexed with KMT2A  
241 and PSIP peptides) by analysis both of Menin chains in isolation (chains A, B) and complexed to  
242 KMT2A and PSIP. As expected, regions of decreased solvent accessibility in the complexes aligned  
243 with residues annotated as forming protein-protein contacts (Figure 6). However, the presence of  
244 bound peptides had little effect on  $\Delta\Delta G$  values of benign variants, indicating that these have a

245 neutral effect on protein binding. Conversely, protein binding had a large effect on  $\Delta\Delta G$  values of a  
246 number of pathogenic variants; again, these predominantly occurred at or close to protein  
247 interfaces, indicating that these variants are likely to have a direct effect on ligand binding by Menin.  
248

249 ***Destabilizing variants reduce levels of functional Menin protein.*** Previous reports studying the  
250 effects of missense variants on levels of functional Menin within the cell have shown that pathogenic  
251 variants have a tendency to increase protein turnover and/or reduce the steady-state level of  
252 protein, while benign variants tend to have no such effect (40, 41). We correlated the previously-  
253 reported effects of variants on levels of steady-state protein with average  $\Delta\Delta G$  values, and observed  
254 that variants which were predicted to be strongly destabilizing *in silico* ( $\Delta\Delta G > 3$  kcal/mol) exhibited  
255 significantly lower levels of steady-state protein in cell-based assays ( $p=0.0001$ , Figure 7), consistent  
256 with the hypothesis that variants with high  $\Delta\Delta G$  values reduce the biological activity of Menin.

257

258 ***Can  $\Delta\Delta G$  value be used as an aid to variant classification?*** To evaluate the clinical validity of  $\Delta\Delta G$   
259 values, we performed Receiver Operating Characteristic (ROC) curve analysis for the groups of  
260 benign and pathogenic variants and compared the results with the outputs from a number of  
261 commonly-used phenotypic predictions tools: SIFT (42), PolyPhen (43) and REVEL (44). All methods  
262 yielded areas under the curve (AUC) of 0.819-0.864, indicating that all have clinical validity (Figure  
263 8A). However  $\Delta\Delta G$  analysis resulted in the highest specificity but lowest sensitivity. Values of  $\Delta\Delta G >$   
264 3 kcal/mol are generally regarded as being strongly destabilizing towards protein structure (45);  
265 taking this as a threshold for variant classification gives sensitivity and specificity of 67.1% and 89.4%  
266 (positive predictive value, 86.4%), while setting a more conservative threshold of  $\geq 4$  kcal/mol yields  
267 increased the specificity to 95.0%, though with a concomitant loss of sensitivity (54.0%; positive  
268 predictive value, 90.6%). A marginal increase in positive predictive value (PPV) could be obtained by  
269 combining  $\Delta\Delta G$  thresholds with a cut-off in the REVEL score of 0.7, which has been reported to  
270 exclude 95% of false positive calls (46), yielding PPV's of 87.7% at  $\Delta\Delta G \geq 3$  kcal/mol and 91.5% at

271  $\Delta\Delta G \geq 4$  kcal/mol. Notably, all seven novel missense variants reported here cluster within the upper  
272 right quadrant (Figure 8B), consistent with a severe impact on protein stability and suggesting that  
273  $\Delta\Delta G$  values can potentially be used to provide evidence towards variant classification in *MEN1*.

274

275

## 276 **DISCUSSION**

277 Previous work has shown that predicted thermodynamic destabilization of protein structure, as  
278 measured by  $\Delta\Delta G$  values calculated by FoldX, can be used as a predictor of pathogenicity in *MSH2*  
279 and *PAH* variants (7, 8). Our data indicates that the same is true for variants in *MEN1*, and that a high  
280 predicted  $\Delta\Delta G$  value is a strong positive predictor for pathogenicity. Using a threshold of only 3  
281 kcal/mol, specificity for variant classification was 89.4%, rising to 95.0% for a more conservative  
282 threshold of 4 kcal/mol. By contrast, using a proposed threshold of 0.7 for the phenotypic meta-  
283 prediction tool REVEL yielded a specificity of only 53%. Since *MEN1* has variable penetrance and  
284 often late onset, the identification of likely pathogenic variants has significant implications for  
285 patient surveillance and genetic testing of family members. With respect to the seven novel  
286 missense variants reported here, all had high average predicted  $\Delta\Delta G$  values (range, 4.81-13.16  
287 kcal/mol) and six were deeply buried within the protein, strongly supporting pathogenicity. All these  
288 cases were also predicted as deleterious or probably pathogenic by commonly-used tools for *in silico*  
289 pathogenicity prediction; however, the comparatively low specificity of all these tools for variants in  
290 *MEN1* highlights the value of thermodynamic analysis as a means of reducing false positive calls.

291

292 As might be expected, our analysis shows that variants which are buried within the Menin structure  
293 are those that are predicted to result in greatest structural destabilization. In fact, the majority of  
294 reported pathogenic variants in *MEN1* are buried, suggesting that any novel variant which is solvent  
295 inaccessible (RSA<0.2) and has a predicted  $\Delta\Delta G >4$  kcal/mol is also highly likely to be pathogenic.

296 Nevertheless, a number of pathogenic variants lie on the surface of Menin, and many of these have

297 relatively low  $\Delta\Delta G$  values. A number of these variants lie at or close to positions of known  
298 interactions with binding partners such as JunD, KMT2A or PSIP, where they presumably have an  
299 adverse effect on binding of these factors, emphasizing the value of integrating all known structural  
300 annotation into a final classification of the likely effect of a variant. Our data also suggests the  
301 possible existence of an as-yet unidentified interaction of Menin, as evidenced by the cluster of  
302 pathogenic variants lying on the protein surface opposite the JunD binding pocket. Notably, *MEN1*  
303 has recently been identified as one of the genes exhibiting significant spatial clustering of pathogenic  
304 variants (47); our analysis suggests that this clustering is likely to apply both to regions of structural  
305 importance, which are buried in the interior of the protein, and to surface regions which form  
306 essential interactions with binding partners.

307

308 In terms of broader applicability of this approach, our work builds upon the reported analysis of  
309 *MSH2* and *PAH* variants and applies it to the classification of novel clinical variants. Whether the  
310 same approach can be used for other proteins remains to be determined. One obvious limitation of  
311 structural analysis is, by definition, the need for a suitable structural model. However, even where  
312 no experimental structures are available for a protein of interest, it may still be possible to use  
313 comparative modelling to generate a reliable model of regions or domains which can be used for  
314 structural analysis. Another likely limitation is the architecture of the protein itself. Both Menin and  
315 *MSH2* are relatively compact, globular proteins, with low surface area to volume ratio and a high  
316 proportion of amino acids in regions of secondary structure. As a result, the effect of missense  
317 variants on the internal geometry and thermodynamic stability of the proteins is amenable to *in*  
318 *silico* prediction, particularly given the availability of suitable high-quality PDB structures. However,  
319 less well-structured proteins, or fibrillar proteins where a greater proportion of amino acids are  
320 exposed to solvent, are likely to be less amenable to such study as the confidence with which the  
321 structural and thermodynamic effects of missense variants can be predicted will be greatly reduced.

322 Such rules are likely to be revealed only by proteome-wide study which is beyond the scope of this  
323 manuscript.

324

325 In summary, we have shown that structural analysis of missense substitutions in *MEN1* can be used  
326 to identify variants likely to destabilize the protein and thus potentially as an aid in variant  
327 classification. Given that all analysis described herein used publicly-available data, freely-available  
328 software and does not require specialist bioinformatic skills or infrastructure, such analysis lies  
329 within the capability of any genetics laboratory or testing service. As such, there is significant scope  
330 to make greater use of protein structural data in the routine interpretation of genetic variation.

331

### 332 **ACKNOWLEDGMENTS**

333 The authors wish to acknowledge support from the Wellcome Trust (grant no. 200990).

334

### 335 **DATA AVAILABILITY**

336 All data generated or analyzed during this study are included in this published article, with the  
337 exception of  $\Delta\Delta G$  and RSA values shown in Table 3, which shows average values for each variant  
338 calculated from all PDB structures used in the analysis as indicated in the table. Full data are  
339 available from the corresponding author on reasonable request.

340

341 **REFERENCES**

- 342 1. Tang H, Thomas PD. Tools for Predicting the Functional Impact of Nonsynonymous Genetic  
343 Variation. *Genetics* 2016;203(2):635-647.
- 344 2. Schymkowitz J, Borg J, Stricher F, Nys R, Rousseau F, Serrano L. The FoldX web server: an online  
345 force field. *Nucleic Acids Res.* 2005;33(Web Server issue):W382-388.
- 346 3. Kellogg EH, Leaver-Fay A, Baker D. Role of conformational sampling in computing mutation-  
347 induced changes in protein structure and stability. *Proteins* 2011;79(3):830-838.
- 348 4. Leaver-Fay A, Tyka M, Lewis SM, Lange OF, Thompson J, Jacak R, Kaufman K, Renfrew PD, Smith  
349 CA, Sheffler W, Davis IW, Cooper S, Treuille A, Mandell DJ, Richter F, Ban YE, Fleishman SJ, Corn  
350 JE, Kim DE, Lyskov S, Berrondo M, Mentzer S, Popović Z, Havranek JJ, Karanicolas J, Das R, Meiler  
351 J, Kortemme T, Gray JJ, Kuhlman B, Baker D, Bradley P. ROSETTA3: an object-oriented software  
352 suite for the simulation and design of macromolecules. *Methods Enzymol.* 2011;487:545-574.
- 353 5. Compiani M, Capriotti E. Computational and theoretical methods for protein folding.  
354 *Biochemistry* 2013;52(48):8601-8624.
- 355 6. Masso M, Vaisman II. AUTO-MUTE: web-based tools for predicting stability changes in proteins  
356 due to single amino acid replacements. *Protein Eng Des Sel.* 2010;23(8):683-687.
- 357 7. Nielsen SV, Stein A, Dinitzen AB, Papaleo E, Tatham MH, Poulsen EG, Kassem MM, Rasmussen LJ,  
358 Lindorff-Larsen K, Hartmann-Petersen R. Predicting the impact of Lynch syndrome-causing  
359 missense mutations from structural calculations. *PLoS Genet.* 2017;13(4):e1006739.
- 360 8. Scheller R, Stein A, Nielsen SV, Marin FI, Gerdes AM, Di Marco M, Papaleo E, Lindorff-Larsen K,  
361 Hartmann-Petersen R. Toward mechanistic models for genotype-phenotype correlations in  
362 phenylketonuria using protein stability calculations. *Hum Mutat.* 2019;40(4):444-457.
- 363 9. Lemos MC, Thakker RV. Multiple endocrine neoplasia type 1 (MEN1): analysis of 1336 mutations  
364 reported in the first decade following identification of the gene. *Hum Mutat.* 2008;29(1):22-32.

- 365 10. Thakker RV, Newey PJ, Walls GV, Bilezikian J, Dralle H, Ebeling PR, Melmed S, Sakurai A, Tonelli F,  
366 Brandi ML; Endocrine Society. Clinical practice guidelines for multiple endocrine neoplasia type 1  
367 (MEN1). *J Clin Endocrinol Metab.* 2012;97(9):2990-3011.
- 368 11. Ellard S, Hattersley AT, Brewer CM, Vaidya B. Detection of an *MEN1* gene mutation depends on  
369 clinical features and supports current referral criteria for diagnostic molecular genetic testing.  
370 *Clin Endocrinol (Oxf).* 2005;62(2):169-175.
- 371 12. Alberto F. Genetics of parathyroids disorders: Overview. *Best Pract Res Clin Endocrinol Metab.*  
372 2018;32(6):781-790.
- 373 13. Beckers A, Aaltonen LA, Daly AF, Karhu A. Familial isolated pituitary adenomas (FIPA) and the  
374 pituitary adenoma predisposition due to mutations in the aryl hydrocarbon receptor interacting  
375 protein (AIP) gene. *Endocr Rev.* 2013;34(2):239-277.
- 376 14. Kövesdi A, Tóth M, Butz H, Szücs N, Sármán B, Pusztai P, Tóke J, Reismann P, Fáklya M, Tóth G,  
377 Somogyi A, Borka K, Erdei A, Nagy EV, Deák V, Valkusz Z, Igaz P, Patócs A, Grolmusz VK. True  
378 MEN1 or phenocopy? Evidence for geno-phenotypic correlations in MEN1 syndrome. *Endocrine*  
379 2019;doi:10.1007/s12020-019-01932-x. [Epub ahead of print].
- 380 15. Schaaf L, Pickel J, Zinner K, Hering U, Höfler M, Goretzki PE, Spelsberg F, Raue F, von zur Mühlen  
381 A, Gerl H, Hensen J, Bartsch DK, Rothmund M, Schneyer U, Dralle H, Engelbach M, Karges W,  
382 Stalla GK, Höppner W. Developing effective screening strategies in multiple endocrine neoplasia  
383 type 1 (MEN 1) on the basis of clinical and sequencing data of German patients with MEN 1. *Exp*  
384 *Clin Endocrinol Diabetes.* 2007;115(8):509-517.
- 385 16. Thakker RV. Multiple endocrine neoplasia type 1 (MEN1) and type 4 (MEN4). *Mol Cell Endocrinol.*  
386 2014;386(1-2):2-15.
- 387 17. Marini F, Giusti F, Brandi ML. Multiple endocrine neoplasia type 1: extensive analysis of a large  
388 database of Florentine patients. *Orphanet J Rare Dis.* 2018;13(1):205.
- 389 18. Concolino P, Costella A, Capoluongo E. Multiple endocrine neoplasia type 1 (MEN1): An update  
390 of 208 new germline variants reported in the last nine years. *Cancer Genet.* 2016;209(1-2):36-41.



- 391 19. Richards S, Aziz N, Bale S, Bick D, Das S, Gastier-Foster J, Grody WW, Hegde M, Lyon E, Spector E,  
392 Voelkerding K, Rehm HL; ACMG Laboratory Quality Assurance Committee. Standards and  
393 guidelines for the interpretation of sequence variants: a joint consensus recommendation of the  
394 American College of Medical Genetics and Genomics and the Association for Molecular  
395 Pathology. *Genet Med*. 2015;17(5):405-424
- 396 20. Romanet P, Odou MF, North MO, Saveanu A, Coppin L, Pasmant E, Mohamed A, Goudet P,  
397 Borson-Chazot F, Calender A, Bérout C, Lévy N, Giraud S, Barlier A. Proposition of adjustments to  
398 the ACMG-AMP framework for the interpretation of *MEN1* missense variants. *Hum Mutat*.  
399 2019;40(6):661-674.
- 400 21. Stenson PD, Mort M, Ball EV, Evans K, Hayden M, Heywood S, Hussain M, Phillips AD, Cooper  
401 DN. The Human Gene Mutation Database: towards a comprehensive repository of inherited  
402 mutation data for medical research, genetic diagnosis and next-generation sequencing studies.  
403 *Hum Genet*. 2017;136(6):665-677. <https://portal.biobase-international.com/cgi-bin/portal/>.  
404 Accessed October 25 2018.
- 405 22. gnomAD (The Genome Aggregation Database). Cambridge, MA: Broad Institute, 2018.  
406 <https://gnomad.broadinstitute.org>. Accessed October 25 2018.
- 407 23. Sydney Genomics Collaborative Database. Sydney, Australia: Garvan Institute of Medical  
408 Research, 2018. <https://sgc.garvan.org.au>. Accessed October 25 2018.
- 409 24. wwPDB consortium. Protein Data Bank: the single global archive for 3D macromolecular  
410 structure data. *Nucleic Acids Res*. 2019;47(Database issue):D520-D528. <http://www.wwpdb.org>.  
411 Accessed October 25 2018.
- 412 25. Huang J, Gurung B, Wan B, Matkar S, Veniaminova NA, Wan K, Merchant JL, Hua X, Lei M. The  
413 same pocket in menin binds both MLL and JUND but has opposite effects on transcription.  
414 *Nature*. 2012;482(7386):542-546.

- 415 26. Shi A, Murai MJ, He S, Lund G, Hartley T, Purohit T, Reddy G, Chruszcz M, Grembecka J, Cierpicki  
416 T. Structural insights into inhibition of the bivalent menin-MLL interaction by small molecules in  
417 leukemia. *Blood*. 2012; 120(23):4461-4469.
- 418 27. Zhou H, Liu L, Huang J, Bernard D, Karatas H, Navarro A, Lei M, Wang S. Structure-based design  
419 of high-affinity macrocyclic peptidomimetics to block the menin-mixed lineage leukemia 1  
420 (MLL1) protein-protein interaction. *J Med Chem*. 2013;56(3):1113-1123.
- 421 28. He S, Senter TJ, Pollock J, Han C, Upadhyay SK, Purohit T, Gogliotti RD, Lindsley CW, Cierpicki T,  
422 Stauffer SR, Grembecka J. High-affinity small-molecule inhibitors of the menin-mixed lineage  
423 leukemia (MLL) interaction closely mimic a natural protein-protein interaction. *J Med Chem*.  
424 2014;57(4):1543-1556.
- 425 29. Borkin D, He S, Miao H, Kempinska K, Pollock J, Chase J, Purohit T, Malik B, Zhao T, Wang J, Wen  
426 B, Zong H, Jones M, Danet-Desnoyers G, Guzman ML, Talpaz M, Bixby DL, Sun D, Hess JL,  
427 Muntean AG, Maillard I, Cierpicki T, Grembecka J. Pharmacologic inhibition of the Menin-MLL  
428 interaction blocks progression of MLL leukemia in vivo. *Cancer Cell*. 2015;27(4):589-602.
- 429 30. Borkin D, Pollock J, Kempinska K, Purohit T, Li X, Wen B, Zhao T, Miao H, Shukla S, He M, Sun D,  
430 Cierpicki T, Grembecka J. Property Focused Structure-Based Optimization of Small Molecule  
431 Inhibitors of the Protein-Protein Interaction between Menin and Mixed Lineage Leukemia (MLL).  
432 *J Med Chem*. 2016;59(3):892-913.
- 433 31. Pollock J, Borkin D, Lund G, Purohit T, Dyguda-Kazimierowicz E, Grembecka J, Cierpickiet T.  
434 Rational Design of Orthogonal Multipolar Interactions with Fluorine in Protein-Ligand  
435 Complexes. *J Med Chem*. 2015;58(18):7465-7474.
- 436 32. Xu S, Aguilar A, Xu T, Zheng K, Huang L, Stuckey J, Chinnaswamy K, Bernard D, Fernández-Salas E,  
437 Liu L, Wang M, McEachern D, Przybranowski S, Foster C, Wang S. Design of the First-in-Class,  
438 Highly Potent Irreversible Inhibitor Targeting the Menin-MLL Protein-Protein Interaction. *Angew*  
439 *Chem Int Ed Engl*. 2018;57(6):1601-1605.

- 440 33. FoldX Suite. Version 4. Available at <http://foldxsuite.crg.eu/>. The FoldX Consortium, Centre for  
441 Genomic Regulation, 2018.
- 442 34. The PyMOL Molecular Graphics System, Version 2.2. Schrödinger, LLC, 2018.
- 443 35. Kabsch W, Sander C. Dictionary of protein secondary structure: pattern recognition of hydrogen-  
444 bonded and geometrical features. *Biopolymers*. 1983; 22(12):2577-2637.
- 445 36. Touw WG, Baakman C, Black J, te Beek TA, Krieger E, Joosten RP, Vriend G. A series of PDB-  
446 related databanks for everyday needs. *Nucleic Acids Res*. 2015; 43(Database issue):D364-D368.
- 447 37. DSSP-3.0.0. Nijmegen, Netherlands: Centre for Molecular and Biomolecular Informatics,  
448 Radboud University Medical Centre, 2018. <https://swift.cmbi.umcn.nl/gv/dssp/index.html>
- 449 38. Tien MZ, Meyer AG, Sydykova DK, Spielman SJ, Wilke CO. Maximum allowed solvent  
450 accessibilities of residues in proteins. *PLoS One*. 2013;8(11):e80635.
- 451 39. Kozlowski LP, Bujnicki JM. MetaDisorder: a meta-server for the prediction of intrinsic disorder in  
452 proteins. *BMC Bioinformatics*. 2012;13:111. <http://genesilico.pl/metadisorder/>. Accessed  
453 December 31 2018.
- 454 40. Shimazu S, Nagamura Y, Yaguchi H, Ohkura N, Tsukada T. Correlation of mutant menin stability  
455 with clinical expression of multiple endocrine neoplasia type 1 and its incomplete forms. *Cancer*  
456 *Sci*. 2011;102(11):2097-2102.
- 457 41. Canaff L, Vanbellin ghen JF, Kanazawa I, Kwak H, Garfield N, Vautour L, Hendy GN. Menin  
458 missense mutants encoded by the *MEN1* gene that are targeted to the proteasome: restoration  
459 of expression and activity by CHIP siRNA. *J Clin Endocrinol Metab*. 2012;97(2):E282-291.
- 460 42. SIFT (Sorts Intolerant from Tolerant). La Jolla, CA: J. Craig Venter Institute.  
461 <http://provean.jcvi.org/index.php>. Accessed March 03 2019.
- 462 43. Adzhubei IA, Schmidt S, Peshkin L, Ramensky VE, Gerasimova A, Bork P, Kondrashov AS, Sunyaev  
463 SR. A method and server for predicting damaging missense mutations. *Nat Methods*.  
464 2010;7(4):248-249. <http://genetics.bwh.harvard.edu/pph2/>. Accessed March 03 2019.

- 465 44. Ioannidis NM, Rothstein JH, Pejaver V, Middha S, McDonnell SK, Baheti S, Musolf A, Li Q,  
466 Holzinger E, Karyadi D, Cannon-Albright LA, Teerlink CC, Stanford JL, Isaacs WB, Xu J, Cooney KA,  
467 Lange EM, Schleutker J, Carpten JD, Powell IJ, Cussenot O, Cancel-Tassin G, Giles GG, MacInnis  
468 RJ, Maier C, Hsieh CL, Wiklund F, Catalona WJ, Foulkes WD, Mandal D, Eeles RA, Kote-Jarai Z,  
469 Bustamante CD, Schaid DJ, Hastie T, Ostrander EA, Bailey-Wilson JE, Radivojac P, Thibodeau SN,  
470 Whittamore AS, Sieh W. REVEL: An Ensemble Method for Predicting the Pathogenicity of Rare  
471 Missense Variants. *Am J Hum Genet.* 2016;99(4):877-885.  
472 <https://sites.google.com/site/revelgenomics/downloads>. Accessed March 03 2019.
- 473 45. Tokuriki N, Tawfik DS. Stability effects of mutations and protein evolvability. *Curr Opin Struct*  
474 *Biol.* 2009;19(5):596-604.
- 475 46. Oza AM, DiStefano MT, Hemphill SE, Cushman BJ, Grant AR, Siegert RK, Shen J, Chapin A, Boczek  
476 NJ, Schimmenti LA, Murry JB, Hasadsri L, Nara K, Kenna M, Booth KT, Azaiez H, Griffith A,  
477 Avraham KB, Kremer H, Rehm HL, Amr SS, Abou Tayoun AN; ClinGen Hearing Loss Clinical  
478 Domain Working Group. Expert specification of the ACMG/AMP variant interpretation guidelines  
479 for genetic hearing loss. *Hum Mutat.* 2018;39(11):1593-1613.
- 480 47. Sivley RM, Dou X, Meiler J, Bush WS, Capra JA. Comprehensive Analysis of Constraint on the  
481 Spatial Distribution of Missense Variants in Human Protein Structures. *Am J Hum Genet.*  
482 2018;102(3):415-426.  
483

484 **TABLE & FIGURE LEGENDS**

485 **Table 1: Details of 7 novel missense variants in *MEN1*.** All variants refer to *MEN1* transcript

486 NM\_130799.2, protein NP\_570711.1 (610 amino acid isoform).

487

488 **Table 2: *MEN1* crystal structures used in FoldX analysis.** A total of 29 PDB structures containing 31

489 Menin chains were used for thermodynamic analysis using FoldX; 7 representative structures were

490 also used for relative solvent accessibility (RSA) analysis.

491

492 **Table 3: Unique missense variants, FoldX analysis ( $\Delta\Delta G$ ) and relative solvent accessibility (RSA).**

493 Details are shown for unique missense variants in pathogenic (n=161), benign (n=161) and uncertain

494 (n=9) groups as defined in Materials & Methods. Where the source database included gnomAD,

495 frequency is shown for the variant allele. Phenotypic predictions for each variant show prediction

496 and probability data for PolyPhen2, prediction and score for SIFT and score for REVEL prediction.

497 Results of thermodynamic analysis are shown as average  $\Delta\Delta G$  value and standard deviation, derived

498 from FoldX calculation using the number of PDB structures indicated (#PDBs). 'Protein interaction'

499 columns indicate residues annotated in relevant PDB entries as interacting directly either with JunD

500 and/or KMT2A, both of which bind to the JunD binding pocket of Menin, or to PSIP. Results of

501 relative solvent accessibility (RSA) analysis are shown as average values derived from DSSP analysis

502 of 7 representative structures.

503

504 **Figure 1: Structure and disorder in Menin.** A) The structure of Menin, as represented by PDB entry

505 3u88 chain A; protein surface is coloured from blue, N-terminal to red, C-terminal; the position of

506 the binding pocket for JunD and KMT2A is indicated; numbered residues coloured magenta indicate

507 positions flanking disordered loops which are not resolved in the crystal structure. B) Menin (grey) in

508 complex with KMT2A (yellow) and PSIP (green), as determined in PDB 3u88; note that while one end

509 of KMT2A occupies the binding pocket, interaction with PSIP and other regions of KMT2A extends

510 over a wider region of the Menin surface. C) Probability of intrinsic disorder in Menin, as calculated  
511 by the MetaDisorder predictor, plotted against amino acid position; extended regions of probability  
512 >0.5 are considered to be disordered. D) Coverage of Menin residues in the 31 PDB structures used  
513 in this analysis, aligned against amino acid position as in part C. The top line shows coverage in PDB  
514 3u88A, coloured as in 1A; numbering indicates residues flanking unstructured regions missing from  
515 the crystal structure. Below this, black horizontal lines show coverage for the 30 remaining PDB  
516 structures, while positions of benign and pathogenic variants are indicated by blue or red triangles  
517 indicate respectively. Note that regions of predicted intrinsic disorder are absent from the majority,  
518 if not all crystal structures, consistent with greater mobility of these residues within the crystal, and  
519 that few pathogenic variants have been reported in these regions.

520

521 **Figure 2: Alignment of Menin structures.** A) The  $\alpha$  carbon atoms of the 31 Menin structures used in  
522 this study were aligned to that of PDB 6b41; each chain is shown in ribbon format, coloured by PDB  
523 and chain identifier; the position of the JunD/KMT2A binding pocket is indicated; the short helix  
524 visible at the top right of the rotated figure corresponds to residues 596-608 at the extreme C-  
525 terminal of Menin, which were resolved only in PDB 3u84 chain A. B) As A, but superimposed with  
526 the structures of MLL (blue) and PSIP (grey) from PDB 3u88.

527

528 **Figure 3: Pathogenic variants are predicted to destabilise Menin structure.** A) *In silico* mutagenesis  
529 and thermodynamic analysis for Menin variants; for each variant, the average change in  
530 thermodynamic stability,  $\Delta\Delta G$ , was calculated across all structures contained the relevant residue,  
531 then plotted by variant group; black circles and vertical lines within each data area represent median  
532 and upper and lower quartiles respectively. Numbering above data points shows  $p$  values (Student's  
533 Two-tailed t-test) between groups as indicated. B)  $\Delta\Delta G$  values for benign (blue) and pathogenic (red)  
534 variant groups calculated for 31 individual PDB structures as shown on the x-axis. C) Average  $\Delta\Delta G$   
535 values for benign and pathogenic variants occurring at the same amino acid position (residues with

536 one benign and one pathogenic variant, n=16; residues with two benign and one pathogenic  
537 variants, n=5; residues with one benign and two pathogenic variants, n=1); coloured boxes show the  
538 range between upper and lower quartiles; horizontal lines within each data box show median value;  
539 data points are shown for outliers only. The difference in the average  $\Delta\Delta G$  value between groups  
540 was highly significant ( $p=0.0002$ ).

541

542 **Figure 4: Population frequency of MEN1 variants.** The frequency of benign and uncertain missense  
543 variants in the gnomAD database plotted against  $\Delta\Delta G$  value; blue fill: variants occurring in the  
544 gnomAD database only; yellow fill: variants reported in the gnomAD and SGCD databases; grey fill:  
545 variants in both gnomAD and HGMD Pro (DM class) databases. In cases where different nucleotide  
546 substitutions give rise to the same amino acid change, frequency is shown as a total for all variant  
547 alleles.

548

549 **Figure 5: Molecular distribution of pathogenic and benign variants.** A) Relative solvent accessibility  
550 was calculated for each variant group; black circles and vertical lines within each data area represent  
551 median and upper and lower quartiles respectively. Numbering above data points shows  $p$  values  
552 (Student's Two-tailed t-test) between groups as indicated. B) Buried pathogenic variants are  
553 predicted to be the most destabilising to Menin structure; note that 6/7 of the novel missense  
554 variants reported here are deeply buried within the protein ( $RSA < 0.02$ ), while only novel variant  
555 H46A is solvent accessible. C, D) Surface distribution of solvent-accessible variants. The surface of  
556 Menin (grey), either alone (C) or in complex (D) with KMT2A (yellow) and PSIP (green) shows all  
557 variants with  $RSA > 0.2$ : blue, benign; red, pathogenic; purple colouring show positions at which  
558 different pathogenic and benign variants have been observed; the novel H46A variant is coloured  
559 cyan. The broken yellow oval indicates a cluster of pathogenic variants which may constitute an as  
560 yet unidentified interface for protein-protein interactions. E) Menin is shown as a grey ribbon; novel

561 missense variants are coloured cyan with sidechains displayed in stick format; KMT2A and DSIP are  
562 shown as in D.

563

564 **Figure 6: Effect of protein-protein interaction on  $\Delta\Delta G$ .** Analysis of solvent accessibility and  
565 thermodynamic effect of variants was performed on PDB 3u88 (Menin:KMT2A:DSIP complex), both  
566 on Menin chains in isolation (chains A, B) and as part of the complex. The upper graph shows the  
567 average difference in solvent accessibility by position in the complexed and isolated Menin chains  
568 respectively ( $\Delta RSA = RSA [\text{complex}] - RSA [\text{isolated}]$ ); the lower graph shows the equivalent  
569 difference in average  $\Delta\Delta G$  value at each position (i.e.  $\Delta\Delta\Delta G$ ); data points are labelled for variants  
570 where  $\Delta\Delta\Delta G > 3$  kcal/mol; background shading indicates positions of Menin residues forming contacts  
571 with KMT2A (yellow) or DSIP (green) in PDB 3u88.

572

573 **Figure 7. Predicted thermodynamic stability correlates with observed expression.** A) Steady-state  
574 expression levels have been reported for a number of Menin variants; relative expression level data  
575 was sorted into two groups according to  $\Delta\Delta G$  value as calculated in this study (neutral or weakly  
576 destabilising:  $\Delta\Delta G < 3$  kcal/mol [n=14]; strongly destabilising:  $> 3$  kcal/mol [n=27]); boxes show the  
577 range between upper and lower quartiles; horizontal lines within each data box show median value;  
578 data points are shown for outliers only. The difference in relative expression between the two  
579 groups was highly significant ( $p=0.0001$ ).

580

581 **Figure 8. Using thermodynamic analysis to assess the impact of novel missense variants.** A) ROC  
582 curves for groups of pathogenic and benign variants as functions of  $\Delta\Delta G$  value (red line; AUC, 0.833),  
583 REVEL score (blue line; AUC, 0.864) PolyPhen2 probability for pathogenicity (black line; AUC, 0.819)  
584 and SIFT score (broken black line; AUC = 0.819); open circles on  $\Delta\Delta G$  and REVEL traces indicate  
585 positions corresponding to threshold values of 3 kcal/mol and 0.7 respectively. B) Scatter plot of  
586  $\Delta\Delta G$  value against REVEL score for all variants (red circles, pathogenic; blue fill, benign; grey fill,



587 uncertain; cyan fill, novel). Where different nucleotide substitutions give rise to the same amino acid  
588 change, the REVEL score was calculated as an average of values for the individual nucleotide  
589 variants. Broken horizontal and vertical lines indicate thresholds of  $\Delta\Delta G = 3$  kcal/mol and REVEL  
590 score = 0.7 respectively; note that all 7 novel missense variants cluster in the upper right quadrant of  
591 the plot.  
592

**Table 1: Details of 7 novel missense variants in *MEN1*.** All variants refer to *MEN1* transcript NM\_130799.2, protein NP\_570711.1 (610 amino acid isoform).

| variant #                     | 1                 | 2                 | 3                 | 4                 | 5                 | 6                 | 7                 |
|-------------------------------|-------------------|-------------------|-------------------|-------------------|-------------------|-------------------|-------------------|
| HGVS c. notation              | c.137A>C          | c.490G>C          | c.524T>C          | c.1033G>C         | c.1078A>T         | c.1091T>C         | c.1256G>A         |
| HGVS p. notation              | p.(His46Pro)      | p.(Ala164Pro)     | p.(Leu175Pro)     | p.(Ala345Pro)     | p.(Ile360Phe)     | p.(Phe364Ser)     | p.(Gly419Asp)     |
| genomic variant (GRCh37/hg19) | chr11:64577445T>G | chr11:64575527C>G | chr11:64575493A>G | chr11:64573720C>G | chr11:64573214T>A | chr11:64573201A>G | chr11:64572600C>T |
| reported in gnomAD?           | no                | no                | no                | no                | no                | no                | no                |
| SIFT prediction               | Damaging          | Damaging          | Damaging          | Damaging          | Damaging          | Damaging          | Damaging          |
| PROVEAN prediction            | Deleterious       | Deleterious       | Deleterious       | Deleterious       | Deleterious       | Deleterious       | Deleterious       |
| PolyPhen prediction           | probably damaging | probably damaging | probably damaging | probably damaging | probably damaging | probably damaging | probably damaging |
| REVEL score                   | 0.894             | 0.925             | 0.965             | 0.909             | 0.883             | 0.945             | 0.912             |

**Table 2: MEN1 crystal structures used in FoldX analysis.** A total of 29 PDB structures containing 31 Menin chains were used for thermodynamic analysis using FoldX; 7 representative structures were also used for relative solvent accessibility (RSA) analysis.

| PDB ID | Title                                                                                                    | resolution (Å) | release date | Menin chain(s) | used for RSA analysis? | Reference |
|--------|----------------------------------------------------------------------------------------------------------|----------------|--------------|----------------|------------------------|-----------|
| 3u84   | Crystal structure of Human Menin                                                                         | 2.50           | 15/02/2012   | A, B           | Yes (chain A)          | 25        |
| 3u85   | Crystal structure of human menin in complex with MLL1 (KMT2A)                                            | 3.00           | 15/02/2012   | A              | Yes                    |           |
| 3u86   | Crystal structure of human menin in complex with JunD                                                    | 2.84           | 15/02/2012   | A              |                        |           |
| 3u88   | Crystal structure of human menin in complex with MLL1 (KMT2A) and LEDGF (PSIP)                           | 3.00           | 15/02/2012   | A, B           | Yes (chain B)          |           |
| 4gpq   | Structural insights into inhibition of the bivalent menin-MLL interaction by small molecules in leukemia | 1.46           | 19/09/2012   | A              |                        | 26        |
| 4gg3   | Human menin with bound inhibitor MI-2                                                                    | 1.56           | 19/09/2012   | A              |                        |           |
| 4gg4   | Human menin with bound inhibitor MI-2-2                                                                  | 1.27           | 19/09/2012   | A              |                        |           |
| 4gg6   | Human menin in complex with MLL (KMT2A) peptide                                                          | 1.55           | 19/09/2012   | A              |                        | 27        |
| 4i80   | Crystal structure of human menin in complex with a high-affinity macrocyclic peptidomimetics             | 3.10           | 06/03/2013   | A              | Yes                    |           |
| 4og3   | Human menin with bound inhibitor MIV-3R                                                                  | 2.01           | 05/03/2014   | A              |                        | 28        |
| 4og4   | Human menin with bound inhibitor MIV-3S                                                                  | 1.45           | 05/03/2014   | A              |                        |           |
| 4og5   | Human menin with bound inhibitor MIV-5                                                                   | 1.63           | 05/03/2014   | A              |                        |           |
| 4og6   | Human menin with bound inhibitor MIV-4                                                                   | 1.49           | 05/03/2014   | A              |                        |           |
| 4og7   | Human menin with bound inhibitor MIV-7                                                                   | 2.08           | 05/03/2014   | A              |                        |           |
| 4og8   | Human menin with bound inhibitor MIV-6R                                                                  | 1.53           | 05/03/2014   | A              |                        | 29        |
| 4x5y   | Menin in complex with MI-503                                                                             | 1.59           | 15/04/2015   | A              |                        |           |
| 4x5z   | Menin in complex with MI-136                                                                             | 1.86           | 15/04/2015   | A              |                        |           |
| 5db0   | Menin in complex with MI-352                                                                             | 1.50           | 30/03/2016   | A              |                        | 30        |
| 5db1   | Menin in complex with MI-336                                                                             | 1.86           | 30/03/2016   | A              |                        |           |
| 5db2   | Menin in complex with MI-389                                                                             | 1.54           | 30/03/2016   | A              |                        |           |
| 5db3   | Menin in complex with MI-574                                                                             | 1.71           | 30/03/2016   | A              |                        | 31        |
| 5dd9   | Menin in complex with MI-326                                                                             | 1.62           | 09/09/2015   | A              |                        |           |
| 5dda   | Menin in complex with MI-333                                                                             | 1.83           | 09/09/2015   | A              | Yes                    |           |
| 5ddb   | Menin in complex with MI-319                                                                             | 1.54           | 09/09/2015   | A              |                        |           |
| 5ddc   | Menin in complex with MI-2-3                                                                             | 1.62           | 06/07/2016   | A              |                        |           |
| 5ddd   | Menin in complex with MI-836                                                                             | 2.14           | 09/09/2015   | A              |                        |           |
| 5dde   | Menin in complex with MI-859                                                                             | 1.78           | 09/09/2015   | A              |                        |           |
| 5ddf   | Menin in complex with MI-273                                                                             | 1.66           | 09/09/2015   | A              | Yes                    |           |
| 6b41   | Menin bound to M-525                                                                                     | 2.61           | 24/01/2018   | A              | Yes                    | 32        |

**Table 3: Unique missense variants, FoldX analysis ( $\Delta\Delta G$ ) and relative solvent accessibility (RSA).** Details are shown for unique missense variants in pathogenic (n=161), benign (n=161) and uncertain (n=9) groups as defined in Methods. Where the source database included gnomAD, frequency is shown for the variant allele. Phenotypic predictions for each variant show prediction and probability data for PolyPhen2, prediction and score for SIFT and score for REVEL prediction. Results of thermodynamic analysis are shown as average  $\Delta\Delta G$  value and standard deviation, derived from FoldX calculation using the number of PDB structures indicated (#PDBs). 'Protein interaction' columns indicate residues annotated in relevant PDB entries as interacting directly either with JunD and/or KMT2A, both of which bind to the JunD binding pocket of Menin, or to PSIP. Results of relative solvent accessibility (RSA) analysis are shown as average values derived from DSSP analysis of 7 representative structures.

| Variant details and group |        |        |         |                | source database |        |             |      | Phenotypic predictions |               |            |            |             | $\Delta\Delta G$ (kcal/mol) |        |        | protein interaction |      | RSA_ave |
|---------------------------|--------|--------|---------|----------------|-----------------|--------|-------------|------|------------------------|---------------|------------|------------|-------------|-----------------------------|--------|--------|---------------------|------|---------|
| position                  | aa_ref | aa_alt | variant | analysis group | HGMD Pro        | gnomAD | allele_freq | SGCD | pred_PolyPhen          | prob_PolyPhen | pred_SIFT  | score_SIFT | REVEL score | ave                         | SD     | # PDBs | JunD/KMT2A          | PSIP |         |
| 6                         | A      | P      | A6P     | benign         |                 | Y      | 4.69E-06    |      | possibly damaging      | 0.582         | BENIGN     | 0.260      | 0.659       | -0.5340                     | 0.3238 | 31     |                     |      | 0.4164  |
| 6                         | A      | S      | A6S     | benign         |                 | Y      | 9.37E-06    |      | benign                 | 0.053         | BENIGN     | 0.700      | 0.486       | 0.4777                      | 0.2745 | 31     |                     |      | 0.4164  |
| 12                        | P      | L      | P12L    | pathogenic     | Y               |        |             |      | probably damaging      | 1.000         | PATHOGENIC | 0.000      | 0.892       | 3.0160                      | 0.4390 | 31     |                     |      | 0.2767  |
| 13                        | L      | P      | L13P    | benign         | Y               | Y      | 4.31E-06    |      | probably damaging      | 0.952         | PATHOGENIC | 0.000      | 0.952       | 5.4231                      | 1.2934 | 31     |                     |      | 0.0995  |
| 14                        | R      | C      | R14C    | benign         | Y               | Y      | 4.27E-06    |      | probably damaging      | 0.931         | PATHOGENIC | 0.010      | 0.829       | 1.2309                      | 0.5364 | 31     |                     |      | 0.4338  |
| 14                        | R      | S      | R14S    | benign         | Y               | Y      | 4.27E-06    |      | possibly damaging      | 0.542         | BENIGN     | 0.130      | 0.797       | 0.5869                      | 0.4838 | 31     |                     |      | 0.4338  |
| 15                        | S      | C      | S15C    | benign         | Y               | Y      | 4.26E-06    |      | probably damaging      | 0.927         | BENIGN     | 0.050      | 0.617       | 1.5295                      | 0.4617 | 31     |                     |      | 0.2083  |
| 15                        | S      | F      | S15F    | benign         | Y               | Y      | 3.19E-05    |      | possibly damaging      | 0.904         | PATHOGENIC | 0.040      | 0.584       | 1.8519                      | 1.0156 | 31     |                     |      | 0.2083  |
| 17                        | D      | N      | D17N    | benign         | Y               | Y      | 3.19E-05    |      | benign                 | 0.344         | BENIGN     | 0.410      | 0.634       | 0.7679                      | 0.2995 | 31     |                     |      | 0.4027  |
| 19                        | V      | M      | V19M    | benign         | Y               | Y      | 4.20E-06    |      | probably damaging      | 0.982         | PATHOGENIC | 0.010      | 0.850       | 0.3578                      | 0.7024 | 31     |                     |      | 0.0000  |
| 21                        | R      | H      | R21H    | benign         | Y               | Y      | 8.41E-06    |      | possibly damaging      | 0.731         | BENIGN     | 0.070      | 0.592       | 0.7673                      | 0.2664 | 31     |                     |      | 0.5235  |
| 21                        | R      | L      | R21L    | benign         | Y               | Y      | 4.21E-06    |      | benign                 | 0.398         | BENIGN     | 0.170      | 0.642       | -0.0928                     | 0.2754 | 31     |                     |      | 0.5235  |
| 21                        | R      | S      | R21S    | benign         | Y               | Y      | 1.93E-04    |      | benign                 | 0.166         | BENIGN     | 0.560      | 0.577       | 0.9204                      | 0.4025 | 31     |                     |      | 0.5235  |
| 22                        | L      | R      | L22R    | pathogenic     | Y               |        |             |      | probably damaging      | 0.980         | PATHOGENIC | 0.000      | 0.914       | 4.1552                      | 1.2317 | 31     |                     |      | 0.0043  |
| 25                        | A      | V      | A25V    | benign         | Y               | Y      | 7.42E-06    |      | benign                 | 0.155         | BENIGN     | 0.280      | 0.547       | 0.0684                      | 0.3997 | 31     |                     |      | 0.3389  |
| 26                        | E      | K      | E26K    | pathogenic     | Y               |        |             |      | benign                 | 0.309         | BENIGN     | 0.090      | 0.826       | 2.7855                      | 0.6609 | 31     |                     |      | 0.0096  |
| 28                        | G      | A      | G28A    | pathogenic     | Y               |        |             |      | benign                 | 0.043         | BENIGN     | 0.690      | 0.638       | -0.0115                     | 0.2675 | 31     |                     |      | 0.6415  |
| 29                        | R      | G      | R29G    | benign         | Y               | Y      | 4.23E-06    |      | benign                 | 0.007         | BENIGN     | 0.380      | 0.454       | 1.5044                      | 0.3584 | 31     |                     |      | 0.2430  |
| 32                        | P      | S      | P32S    | benign         | Y               | Y      | 3.42E-05    |      | probably damaging      | 1.000         | PATHOGENIC | 0.000      | 0.848       | 2.9465                      | 0.5281 | 31     |                     |      | 0.0000  |
| 34                        | L      | V      | L34V    | benign         | Y               | Y      | 4.31E-06    |      | probably damaging      | 0.997         | PATHOGENIC | 0.000      | 0.836       | 2.0395                      | 0.4632 | 31     |                     |      | 0.0000  |
| 38                        | S      | P      | S38P    | uncertain      | Y               | Y      | 4.40E-06    |      | probably damaging      | 0.999         | PATHOGENIC | 0.000      | 0.951       | 7.0856                      | 1.1401 | 31     |                     |      | 0.0212  |
| 39                        | L      | W      | L39W    | pathogenic     | Y               |        |             |      | probably damaging      | 0.965         | PATHOGENIC | 0.000      | 0.973       | 11.4983                     | 2.1044 | 31     |                     |      | 0.0007  |
| 40                        | V      | A      | V40A    | benign         | Y               | Y      | 9.01E-06    |      | possibly damaging      | 0.697         | PATHOGENIC | 0.030      | 0.881       | 2.6114                      | 0.1572 | 31     |                     |      | 0.0000  |
| 42                        | G      | D      | G42D    | pathogenic     | Y               |        |             |      | probably damaging      | 1.000         | PATHOGENIC | 0.000      | 0.911       | 10.7359                     | 2.8194 | 31     |                     |      | 0.0330  |
| 42                        | G      | S      | G42S    | pathogenic     | Y               |        |             |      | probably damaging      | 1.000         | PATHOGENIC | 0.000      | 0.935       | 5.4387                      | 1.1875 | 31     |                     |      | 0.0330  |
| 42                        | G      | V      | G42V    | pathogenic     | Y               |        |             |      | probably damaging      | 1.000         | PATHOGENIC | 0.000      | 0.937       | 12.6954                     | 1.9046 | 31     |                     |      | 0.0330  |
| 45                        | E      | A      | E45A    | pathogenic     | Y               |        |             |      | probably damaging      | 0.998         | PATHOGENIC | 0.000      | 0.940       | 1.9144                      | 0.3253 | 31     |                     |      | 0.0224  |
| 45                        | E      | D      | E45D    | pathogenic     | Y               |        |             |      | probably damaging      | 0.996         | PATHOGENIC | 0.000      | 0.902       | 3.7314                      | 0.5378 | 31     |                     |      | 0.0224  |
| 45                        | E      | G      | E45G    | pathogenic     | Y               |        |             |      | probably damaging      | 0.999         | PATHOGENIC | 0.000      | 0.938       | 3.2448                      | 0.4001 | 31     |                     |      | 0.0224  |
| 45                        | E      | K      | E45K    | pathogenic     | Y               |        |             |      | probably damaging      | 0.998         | PATHOGENIC | 0.000      | 0.895       | 2.3318                      | 1.0020 | 31     |                     |      | 0.0224  |
| 45                        | E      | Q      | E45Q    | pathogenic     | Y               |        |             |      | probably damaging      | 0.998         | PATHOGENIC | 0.000      | 0.878       | 0.0126                      | 0.6065 | 31     |                     |      | 0.0224  |
| 45                        | E      | V      | E45V    | pathogenic     | Y               |        |             |      | probably damaging      | 0.999         | PATHOGENIC | 0.000      | 0.959       | 0.5279                      | 0.3788 | 31     |                     |      | 0.0224  |
| 49                        | A      | V      | A49V    | pathogenic     | Y               |        |             |      | possibly damaging      | 0.465         | PATHOGENIC | 0.020      | 0.836       | 1.1529                      | 0.4904 | 31     |                     |      | 0.0487  |
| 52                        | R      | G      | R52G    | pathogenic     | Y               |        |             |      | possibly damaging      | 0.618         | PATHOGENIC | 0.040      | 0.865       | 2.3807                      | 0.8073 | 31     | Y                   |      | 0.4901  |
| 56                        | T      | A      | T56A    | benign         |                 | Y      | 5.04E-06    |      | benign                 | 0.025         | BENIGN     | 0.320      | 0.482       | 0.2220                      | 0.6072 | 8      | Y                   |      | 0.8151  |
| 59                        | P      | L      | P59L    | benign         | Y               | Y      | 1.01E-05    |      | probably damaging      | 0.998         | BENIGN     | 0.380      | 0.832       | 0.9508                      | 0.2605 | 8      |                     |      | 0.7195  |
| 60                        | E      | Q      | E60Q    | benign         | Y               | Y      | 5.06E-06    |      | possibly damaging      | 0.596         | BENIGN     | 0.540      | 0.447       | 0.1899                      | 0.2162 | 8      |                     |      | 0.5641  |
| 63                        | F      | L      | F63L    | benign         | Y               | Y      | 4.99E-06    |      | benign                 | 0.186         | BENIGN     | 1.000      | 0.651       | 2.8941                      | 0.5955 | 8      | Y                   |      | 0.1325  |
| 63                        | F      | Y      | F63Y    | benign         | Y               | Y      | 3.19E-05    |      | possibly damaging      | 0.579         | BENIGN     | 0.990      | 0.654       | 1.2459                      | 0.2243 | 8      | Y                   |      | 0.1325  |
| 65                        | P      | H      | P65H    | benign         | Y               | Y      | 4.96E-06    |      | benign                 | 0.321         | BENIGN     | 0.160      | 0.619       | 2.5332                      | 0.3993 | 8      | Y                   |      | 0.3434  |
| 65                        | P      | S      | P65S    | benign         | Y               | Y      | 5.00E-06    |      | benign                 | 0.043         | BENIGN     | 0.600      | 0.534       | 2.4520                      | 0.4708 | 8      | Y                   |      | 0.3434  |
| 67                        | P      | L      | P67L    | benign         | Y               | Y      | 9.95E-06    |      | benign                 | 0.012         | BENIGN     | 0.480      | 0.636       | 0.7152                      | 0.2640 | 8      |                     |      | 0.7082  |
| 70                        | D      | E      | D70E    | benign         | Y               | Y      | 4.82E-06    |      | benign                 | 0.026         | BENIGN     | 0.580      | 0.479       | -0.2189                     | 0.2592 | 8      |                     |      | 0.6715  |

|     |   |   |       |            |   |          |                   |        |            |        |       |         |        |        |    |   |        |        |
|-----|---|---|-------|------------|---|----------|-------------------|--------|------------|--------|-------|---------|--------|--------|----|---|--------|--------|
| 73  | G | D | G73D  | benign     | Y | 4.71E-06 | benign            | 0.391  | BENIGN     | 0.620  | 0.662 | 3.3262  | 2.1752 | 6      |    |   | 0.4784 |        |
| 74  | G | D | G74D  | benign     | Y | 3.20E-05 | benign            | 0.009  | BENIGN     | 0.170  | 0.547 | 1.6804  | 1.3179 | 30     |    |   | 0.6030 |        |
| 79  | P | A | P79A  | benign     | Y | 3.20E-05 | probably damaging | 1.000  | PATHOGENIC | 0.000  | 0.947 | 2.4887  | 0.1880 | 31     |    |   | 0.0305 |        |
| 80  | V | M | V80M  | benign     | Y | 4.34E-06 | probably damaging | 0.933  | BENIGN     | 0.120  | 0.594 | -0.3031 | 0.3893 | 31     |    |   | 0.0944 |        |
| 82  | D | E | D82E  | benign     |   |          | benign            | 0.038  | BENIGN     | 1.000  | 0.504 | 1.4358  | 0.5530 | 31     | Y  |   | 0.2628 |        |
| 83  | L | P | L83P  | benign     | Y | 1.68E-05 | probably damaging | 0.929  | PATHOGENIC | 0.020  | 0.839 | -0.0824 | 0.4428 | 31     |    |   | 0.2552 |        |
| 84  | S | P | S84P  | benign     | Y | 4.17E-06 | benign            | 0.020  | BENIGN     | 0.290  | 0.706 | 0.6858  | 0.7237 | 31     |    |   | 0.4922 |        |
| 86  | I | V | I86V  | benign     | Y | 4.10E-06 | benign            | 0.038  | BENIGN     | 1.000  | 0.520 | 1.3403  | 0.1094 | 31     |    |   | 0.0015 |        |
| 90  | Y | C | Y90C  | benign     |   |          | benign            | 0.346  | BENIGN     | 0.070  | 0.835 | 4.2845  | 0.3601 | 31     | Y  |   | 0.0755 |        |
| 91  | A | V | A91V  | pathogenic | Y |          | benign            | 0.056  | BENIGN     | 0.290  | 0.667 | 0.4713  | 0.1697 | 31     |    |   | 0.4131 |        |
| 92  | R | G | R92G  | benign     | Y | 4.03E-06 | possibly damaging | 0.826  | PATHOGENIC | 0.010  | 0.844 | 2.2437  | 0.2400 | 31     | Y  | Y | 0.5057 |        |
| 92  | R | H | R92H  | benign     | Y | 8.03E-06 | probably damaging | 0.933  | PATHOGENIC | 0.010  | 0.856 | 1.3761  | 0.2515 | 31     | Y  | Y | 0.5057 |        |
| 95  | A | G | A95G  | benign     |   |          | possibly damaging | 0.547  | PATHOGENIC | 0.040  | 0.731 | 0.6061  | 0.0835 | 31     |    | Y | 0.4884 |        |
| 98  | R | L | R98L  | pathogenic | Y |          | possibly damaging | 0.560  | BENIGN     | 0.120  | 0.817 | 0.3349  | 0.3609 | 31     |    | Y | 0.4630 |        |
| 100 | A | V | A100V | benign     | Y | 1.60E-05 | benign            | 0.082  | BENIGN     | 0.130  | 0.700 | 1.1253  | 0.5296 | 31     |    |   | 0.3621 |        |
| 101 | V | A | V101A | benign     | Y | 3.99E-06 | possibly damaging | 0.779  | BENIGN     | 0.070  | 0.906 | 3.7036  | 0.5968 | 31     |    | Y | 0.0361 |        |
| 101 | V | I | V101I | benign     | Y | 3.99E-06 | possibly damaging | 0.851  | BENIGN     | 0.240  | 0.711 | -1.1771 | 0.1592 | 31     |    | Y | 0.0361 |        |
| 104 | S | A | S104A | benign     | Y | 3.98E-06 | possibly damaging | 0.465  | BENIGN     | 0.220  | 0.797 | 0.7002  | 0.3028 | 31     |    | Y | 0.5889 |        |
| 107 | P | S | P107S | benign     | Y | 3.98E-06 | benign            | 0.389  | BENIGN     | 0.750  | 0.616 | 0.9495  | 0.2669 | 31     |    |   | 0.6577 |        |
| 108 | R | G | R108G | benign     | Y | 7.96E-06 | benign            | 0.007  | BENIGN     | 0.360  | 0.571 | 1.3232  | 0.5531 | 31     |    |   | 0.3436 |        |
| 108 | R | Q | R108Q | benign     | Y | 3.19E-05 | benign            | 0.344  | BENIGN     | 0.610  | 0.524 | 0.6114  | 0.3788 | 31     |    |   | 0.3436 |        |
| 109 | E | D | E109D | benign     | Y | 3.98E-06 | benign            | 0.009  | BENIGN     | 0.910  | 0.292 | 0.0795  | 0.2337 | 31     |    |   | 0.6662 |        |
| 110 | G | E | G110E | uncertain  | Y | Y        | 7.96E-06          | benign | 0.292      | BENIGN | 0.450 | 0.671   | 1.8165 | 1.1920 | 31 |   |        | 0.7212 |
| 116 | E | G | E116G | pathogenic | Y |          | possibly damaging | 0.882  | PATHOGENIC | 0.010  | 0.942 | 2.4131  | 0.2424 | 31     |    |   | 0.5535 |        |
| 118 | V | A | V118A | benign     | Y | 3.98E-06 | possibly damaging | 0.795  | PATHOGENIC | 0.010  | 0.942 | 2.3403  | 0.1584 | 31     |    |   | 0.0057 |        |
| 118 | V | L | V118L | benign     | Y | 3.98E-06 | possibly damaging | 0.591  | PATHOGENIC | 0.040  | 0.823 | -0.8529 | 0.3980 | 31     |    |   | 0.0057 |        |
| 121 | V | A | V121A | benign     | Y | 3.98E-06 | probably damaging | 0.947  | PATHOGENIC | 0.010  | 0.968 | 2.4811  | 0.1451 | 31     |    |   | 0.0000 |        |
| 121 | V | I | V121I | benign     | Y | 3.98E-06 | possibly damaging | 0.612  | BENIGN     | 0.120  | 0.773 | -0.4038 | 0.4065 | 31     |    |   | 0.0000 |        |
| 134 | F | L | F134L | benign     | Y | 3.18E-05 | benign            | 0.349  | PATHOGENIC | 0.030  | 0.866 | -0.0536 | 0.2579 | 31     |    |   | 0.6690 |        |
| 137 | R | G | R137G | benign     | Y | 3.98E-06 | probably damaging | 0.939  | PATHOGENIC | 0.010  | 0.850 | 0.6389  | 0.4195 | 31     | Y  |   | 0.3843 |        |
| 139 | H | D | H139D | pathogenic | Y |          | probably damaging | 0.999  | PATHOGENIC | 0.000  | 0.936 | 4.3772  | 0.6484 | 31     |    |   | 0.1486 |        |
| 139 | H | N | H139N | pathogenic | Y |          | probably damaging | 0.999  | PATHOGENIC | 0.000  | 0.867 | 0.6698  | 0.3868 | 31     |    |   | 0.1486 |        |
| 139 | H | P | H139P | pathogenic | Y |          | probably damaging | 0.999  | PATHOGENIC | 0.000  | 0.862 | 4.9157  | 0.7108 | 31     |    |   | 0.1486 |        |
| 139 | H | Q | H139Q | pathogenic | Y |          | probably damaging | 0.999  | PATHOGENIC | 0.000  | 0.825 | 1.4896  | 0.3918 | 31     |    |   | 0.1486 |        |
| 139 | H | R | H139R | pathogenic | Y |          | probably damaging | 0.999  | PATHOGENIC | 0.000  | 0.855 | 1.0663  | 0.7935 | 31     |    |   | 0.1486 |        |
| 139 | H | Y | H139Y | pathogenic | Y |          | probably damaging | 0.999  | PATHOGENIC | 0.000  | 0.953 | 4.4160  | 1.1166 | 31     |    |   | 0.1486 |        |
| 141 | Q | R | Q141R | benign     | Y | 3.98E-06 | probably damaging | 0.994  | PATHOGENIC | 0.000  | 0.968 | 0.8635  | 0.7206 | 31     |    |   | 0.0997 |        |
| 144 | F | C | F144C | pathogenic | Y |          | probably damaging | 0.977  | PATHOGENIC | 0.000  | 0.960 | 3.6593  | 0.3648 | 31     |    |   | 0.0863 |        |
| 144 | F | V | F144V | pathogenic | Y |          | possibly damaging | 0.736  | PATHOGENIC | 0.010  | 0.973 | 3.3642  | 0.3531 | 31     |    |   | 0.0863 |        |
| 147 | I | F | I147F | pathogenic | Y |          | possibly damaging | 0.533  | PATHOGENIC | 0.020  | 0.822 | 6.5569  | 2.3759 | 31     |    |   | 0.0515 |        |
| 148 | T | P | T148P | pathogenic | Y |          | probably damaging | 0.956  | PATHOGENIC | 0.040  | 0.859 | 3.6064  | 1.0523 | 31     |    |   | 0.4410 |        |
| 149 | G | R | G149R | benign     | Y | 1.19E-05 | probably damaging | 0.992  | PATHOGENIC | 0.000  | 0.661 | -0.8710 | 0.5338 | 31     | Y  |   | 0.2500 |        |
| 150 | T | N | T150N | benign     | Y | 4.16E-06 | benign            | 0.010  | BENIGN     | 1.000  | 0.592 | -1.7141 | 0.6731 | 31     |    |   | 0.2849 |        |
| 150 | T | S | T150S | benign     | Y | 4.17E-06 | benign            | 0.041  | BENIGN     | 0.600  | 0.588 | -1.3414 | 0.4688 | 31     |    |   | 0.2849 |        |
| 153 | D | E | D153E | pathogenic | Y |          | probably damaging | 0.999  | PATHOGENIC | 0.000  | 0.940 | 0.7734  | 1.5967 | 31     | Y  |   | 0.1355 |        |
| 153 | D | V | D153V | pathogenic | Y |          | probably damaging | 1.000  | PATHOGENIC | 0.000  | 0.953 | 1.1639  | 0.9191 | 31     | Y  |   | 0.1355 |        |
| 153 | D | Y | D153Y | pathogenic | Y |          | probably damaging | 1.000  | PATHOGENIC | 0.000  | 0.941 | 1.8806  | 3.0010 | 31     | Y  |   | 0.1355 |        |
| 154 | S | I | S154I | pathogenic | Y |          | possibly damaging | 0.723  | PATHOGENIC | 0.010  | 0.848 | 1.3508  | 0.8337 | 31     | Y  |   | 0.1770 |        |
| 155 | S | F | S155F | pathogenic | Y |          | benign            | 0.005  | BENIGN     | 1.000  | 0.687 | -0.6995 | 2.4066 | 31     | Y  |   | 0.1880 |        |
| 156 | G | C | G156C | pathogenic | Y |          | probably damaging | 1.000  | PATHOGENIC | 0.000  | 0.932 | 3.3558  | 0.9748 | 31     | Y  |   | 0.0124 |        |
| 156 | G | D | G156D | pathogenic | Y |          | probably damaging | 1.000  | PATHOGENIC | 0.000  | 0.941 | 13.2142 | 1.8654 | 31     | Y  |   | 0.0124 |        |
| 156 | G | R | G156R | pathogenic | Y |          | probably damaging | 1.000  | PATHOGENIC | 0.000  | 0.932 | 10.8362 | 2.4296 | 31     | Y  |   | 0.0124 |        |
| 156 | G | S | G156S | pathogenic | Y |          | probably damaging | 1.000  | PATHOGENIC | 0.000  | 0.972 | 2.1774  | 0.6195 | 31     | Y  |   | 0.0124 |        |
| 156 | G | V | G156V | pathogenic | Y |          | probably damaging | 1.000  | PATHOGENIC | 0.000  | 0.926 | 6.5116  | 1.6951 | 31     | Y  |   | 0.0124 |        |
| 158 | A | D | A158D | pathogenic | Y |          | probably damaging | 0.999  | PATHOGENIC | 0.000  | 0.972 | 7.3823  | 0.8188 | 31     |    |   | 0.0000 |        |
| 160 | A | G | A160G | benign     | Y | 4.00E-06 | benign            | 0.162  | BENIGN     | 0.100  | 0.837 | 2.1783  | 0.0977 | 31     |    |   | 0.0011 |        |
| 160 | A | P | A160P | pathogenic | Y |          | probably damaging | 0.982  | PATHOGENIC | 0.010  | 0.954 | 5.5304  | 0.8689 | 31     |    |   | 0.0011 |        |
| 160 | A | T | A160T | pathogenic | Y |          | possibly damaging | 0.670  | PATHOGENIC | 0.010  | 0.936 | 0.8832  | 0.6791 | 31     |    |   | 0.0011 |        |

|     |   |   |       |            |   |   |          |                   |       |            |       |       |         |        |    |        |
|-----|---|---|-------|------------|---|---|----------|-------------------|-------|------------|-------|-------|---------|--------|----|--------|
| 162 | V | A | V162A | benign     |   | Y | 8.00E-06 | probably damaging | 0.948 | PATHOGENIC | 0.000 | 0.966 | 2.3030  | 0.1388 | 31 | 0.0000 |
| 162 | V | F | V162F | pathogenic | Y |   |          | probably damaging | 0.992 | PATHOGENIC | 0.000 | 0.957 | 13.5779 | 2.6237 | 31 | 0.0000 |
| 164 | A | D | A164D | pathogenic | Y |   |          | probably damaging | 0.953 | PATHOGENIC | 0.010 | 0.971 | 7.9503  | 1.4645 | 31 | 0.0000 |
| 164 | A | S | A164S | benign     |   | Y | 4.00E-06 | possibly damaging | 0.857 | BENIGN     | 0.080 | 0.852 | 1.7389  | 0.3372 | 31 | 0.0000 |
| 165 | C | R | C165R | pathogenic | Y |   |          | probably damaging | 0.982 | PATHOGENIC | 0.000 | 0.959 | 7.1080  | 1.4289 | 31 | 0.0000 |
| 165 | C | Y | C165Y | pathogenic | Y |   |          | probably damaging | 0.991 | PATHOGENIC | 0.000 | 0.953 | 9.2796  | 1.3621 | 31 | 0.0000 |
| 167 | A | V | A167V | benign     |   | Y | 3.99E-06 | benign            | 0.058 | BENIGN     | 1.000 | 0.488 | -0.2112 | 0.6056 | 31 | 0.0986 |
| 168 | L | P | L168P | pathogenic | Y |   |          | probably damaging | 1.000 | PATHOGENIC | 0.000 | 0.956 | 6.7526  | 0.9219 | 31 | 0.0796 |
| 170 | L | V | L170V | benign     |   | Y | 3.98E-06 | benign            | 0.352 | BENIGN     | 0.180 | 0.720 | 3.5141  | 0.7089 | 31 | 0.0092 |
| 171 | R | Q | R171Q | benign     |   | Y | 1.22E-02 | benign            | 0.444 | BENIGN     | 0.150 | 0.434 | 0.1461  | 0.3020 | 31 | 0.5594 |
| 171 | R | W | R171W | benign     |   | Y | 7.08E-05 | benign            | 0.154 | PATHOGENIC | 0.010 | 0.657 | 0.5226  | 0.4582 | 31 | 0.5594 |
| 172 | D | V | D172V | pathogenic | Y |   |          | possibly damaging | 0.615 | PATHOGENIC | 0.000 | 0.938 | 2.4490  | 0.7182 | 31 | 0.1095 |
| 172 | D | Y | D172Y | pathogenic | Y |   |          | probably damaging | 0.987 | PATHOGENIC | 0.000 | 0.943 | 2.4656  | 0.9278 | 31 | 0.1095 |
| 174 | H | P | H174P | pathogenic | Y |   |          | possibly damaging | 0.905 | PATHOGENIC | 0.000 | 0.944 | 5.9444  | 0.6535 | 31 | 0.1639 |
| 175 | L | R | L175R | pathogenic | Y |   |          | probably damaging | 0.999 | PATHOGENIC | 0.000 | 0.955 | 5.9130  | 0.7482 | 31 | 0.0007 |
| 176 | A | P | A176P | pathogenic | Y |   |          | probably damaging | 0.983 | PATHOGENIC | 0.010 | 0.942 | 6.8178  | 0.8335 | 31 | 0.0000 |
| 176 | A | S | A176S | benign     |   | Y | 1.99E-05 | possibly damaging | 0.622 | BENIGN     | 0.100 | 0.868 | 1.5213  | 0.6669 | 31 | 0.0000 |
| 176 | A | T | A176T | benign     |   | Y | 3.98E-06 | possibly damaging | 0.572 | PATHOGENIC | 0.010 | 0.943 | 3.0286  | 0.8171 | 31 | 0.0000 |
| 179 | E | D | E179D | pathogenic | Y |   |          | probably damaging | 0.917 | PATHOGENIC | 0.000 | 0.893 | 4.7402  | 0.6227 | 31 | 0.0378 |
| 179 | E | K | E179K | pathogenic | Y |   |          | possibly damaging | 0.852 | PATHOGENIC | 0.000 | 0.937 | 6.9708  | 2.1935 | 31 | 0.0378 |
| 179 | E | Q | E179Q | pathogenic | Y |   |          | possibly damaging | 0.730 | PATHOGENIC | 0.000 | 0.924 | 2.9444  | 0.7707 | 31 | 0.0378 |
| 180 | D | A | D180A | pathogenic | Y |   |          | probably damaging | 0.976 | PATHOGENIC | 0.000 | 0.951 | -0.8830 | 0.4597 | 31 | 0.2073 |
| 180 | D | E | D180E | benign     |   | Y | 3.98E-06 | probably damaging | 0.971 | PATHOGENIC | 0.000 | 0.864 | 0.4977  | 0.5395 | 31 | 0.2073 |
| 180 | D | V | D180V | benign     |   | Y | 3.19E-05 | probably damaging | 0.969 | PATHOGENIC | 0.000 | 0.949 | 0.0389  | 0.6952 | 31 | 0.2073 |
| 181 | H | R | H181R | pathogenic | Y |   |          | probably damaging | 0.939 | PATHOGENIC | 0.000 | 0.930 | 0.1134  | 1.7384 | 31 | 0.0459 |
| 182 | A | T | A182T | benign     |   | Y | 3.98E-06 | possibly damaging | 0.615 | PATHOGENIC | 0.030 | 0.905 | 0.8528  | 0.6471 | 31 | 0.0111 |
| 182 | A | V | A182V | benign     |   | Y | 3.98E-06 | possibly damaging | 0.615 | BENIGN     | 0.280 | 0.888 | 0.2929  | 0.7907 | 31 | 0.0111 |
| 183 | W | R | W183R | pathogenic | Y |   |          | probably damaging | 0.975 | PATHOGENIC | 0.000 | 0.929 | 5.0966  | 1.2239 | 31 | 0.0000 |
| 183 | W | S | W183S | pathogenic | Y |   |          | possibly damaging | 0.615 | PATHOGENIC | 0.000 | 0.903 | 4.8391  | 0.7219 | 31 | 0.0000 |
| 184 | V | E | V184E | pathogenic | Y |   |          | possibly damaging | 0.682 | PATHOGENIC | 0.000 | 0.933 | 6.7501  | 1.1294 | 31 | 0.0000 |
| 185 | V | A | V185A | benign     |   | Y | 3.98E-06 | benign            | 0.132 | PATHOGENIC | 0.020 | 0.775 | 1.7730  | 0.2750 | 31 | 0.0337 |
| 185 | V | M | V185M | benign     |   | Y | 3.19E-05 | benign            | 0.384 | BENIGN     | 0.080 | 0.689 | 0.6731  | 0.6493 | 31 | 0.0337 |
| 188 | P | L | P188L | uncertain  | Y | Y | 6.37E-05 | benign            | 0.406 | PATHOGENIC | 0.040 | 0.678 | 1.2977  | 0.3977 | 31 | 0.4645 |
| 188 | P | S | P188S | benign     |   | Y | 3.19E-05 | benign            | 0.107 | BENIGN     | 0.100 | 0.448 | 2.0940  | 0.3936 | 31 | 0.4645 |
| 189 | N | K | N189K | benign     |   | Y | 3.98E-06 | benign            | 0.016 | BENIGN     | 0.600 | 0.405 | 0.0201  | 0.2781 | 31 | 0.7692 |
| 189 | N | S | N189S | benign     |   | Y | 2.39E-05 | benign            | 0.135 | BENIGN     | 0.430 | 0.419 | 0.4844  | 0.2157 | 31 | 0.7692 |
| 192 | Q | K | Q192K | pathogenic | Y |   |          | benign            | 0.232 | PATHOGENIC | 0.030 | 0.549 | -0.0430 | 0.3342 | 31 | 0.3543 |
| 193 | T | I | T193I | pathogenic | Y |   |          | possibly damaging | 0.899 | PATHOGENIC | 0.000 | 0.974 | 0.9707  | 0.5893 | 31 | 0.0274 |
| 195 | E | G | E195G | pathogenic | Y |   |          | probably damaging | 0.982 | PATHOGENIC | 0.000 | 0.955 | 3.4234  | 0.4687 | 31 | 0.0243 |
| 210 | T | I | T210I | benign     |   | Y | 3.98E-06 | benign            | 0.266 | PATHOGENIC | 0.040 | 0.752 | 0.6793  | 0.3545 | 31 | 0.2650 |
| 212 | N | D | N212D | benign     |   | Y | 3.98E-06 | benign            | 0.009 | BENIGN     | 0.830 | 0.436 | -0.8192 | 0.5023 | 31 | 0.5201 |
| 214 | G | S | G214S | benign     |   | Y | 2.39E-05 | possibly damaging | 0.518 | BENIGN     | 0.100 | 0.879 | 4.8407  | 1.4332 | 31 | 0.0302 |
| 215 | V | M | V215M | pathogenic | Y |   |          | possibly damaging | 0.896 | PATHOGENIC | 0.020 | 0.799 | -0.7025 | 0.1471 | 31 | 0.2135 |
| 218 | R | Q | R218Q | benign     |   | Y | 3.99E-06 | benign            | 0.020 | BENIGN     | 0.400 | 0.557 | 0.7401  | 0.2913 | 31 | 0.3942 |
| 218 | R | W | R218W | pathogenic | Y |   |          | possibly damaging | 0.755 | PATHOGENIC | 0.000 | 0.753 | 1.4165  | 0.4539 | 31 | 0.3942 |
| 220 | W | L | W220L | pathogenic | Y |   |          | probably damaging | 0.997 | PATHOGENIC | 0.000 | 0.922 | 2.9227  | 0.5116 | 31 | 0.0015 |
| 220 | W | R | W220R | pathogenic | Y |   |          | probably damaging | 0.999 | PATHOGENIC | 0.000 | 0.921 | 4.0051  | 0.9144 | 31 | 0.0015 |
| 220 | W | S | W220S | pathogenic | Y |   |          | probably damaging | 0.998 | PATHOGENIC | 0.000 | 0.901 | 6.7655  | 0.6669 | 31 | 0.0015 |
| 223 | L | P | L223P | pathogenic | Y |   |          | probably damaging | 0.935 | PATHOGENIC | 0.010 | 0.941 | 7.5767  | 0.8001 | 31 | 0.0014 |
| 224 | K | T | K224T | pathogenic | Y |   |          | benign            | 0.284 | BENIGN     | 0.380 | 0.758 | 3.3049  | 0.9831 | 31 | 0.1634 |
| 225 | G | R | G225R | pathogenic | Y |   |          | probably damaging | 0.995 | PATHOGENIC | 0.010 | 0.942 | 2.7029  | 0.3718 | 31 | 0.1717 |
| 226 | S | P | S226P | pathogenic | Y |   |          | possibly damaging | 0.628 | BENIGN     | 0.270 | 0.777 | 3.4129  | 1.2351 | 31 | 0.0618 |
| 228 | M | I | M228I | benign     |   | Y | 3.98E-06 | benign            | 0.018 | BENIGN     | 0.110 | 0.577 | 0.3038  | 0.3738 | 31 | 0.0108 |
| 229 | R | C | R229C | benign     |   | Y | 7.96E-06 | benign            | 0.013 | PATHOGENIC | 0.030 | 0.624 | 0.9193  | 0.2721 | 31 | 0.4166 |
| 229 | R | H | R229H | uncertain  | Y | Y | 3.98E-06 | benign            | 0.041 | BENIGN     | 0.140 | 0.622 | 1.7757  | 0.3599 | 31 | 0.4166 |
| 229 | R | L | R229L | pathogenic | Y |   |          | benign            | 0.054 | BENIGN     | 0.240 | 0.598 | -0.0602 | 0.3253 | 31 | 0.4166 |
| 232 | R | C | R232C | benign     |   | Y | 3.98E-06 | probably damaging | 0.999 | PATHOGENIC | 0.000 | 0.932 | 3.8895  | 0.7070 | 31 | 0.0381 |
| 234 | M | L | M234L | benign     |   | Y | 3.98E-06 | benign            | 0.130 | BENIGN     | 0.180 | 0.780 | -0.0072 | 0.2227 | 31 | 0.0402 |



|     |   |   |       |            |   |   |          |                   |       |            |       |       |         |        |    |          |
|-----|---|---|-------|------------|---|---|----------|-------------------|-------|------------|-------|-------|---------|--------|----|----------|
| 315 | D | Y | D315Y | uncertain  | Y | Y | 3.98E-06 | probably damaging | 0.974 | PATHOGENIC | 0.000 | 0.875 | 4.6447  | 0.6823 | 31 | 0.2457   |
| 316 | E | D | E316D | benign     | Y | Y | 7.95E-06 | benign            | 0.295 | BENIGN     | 0.500 | 0.591 | 0.7773  | 0.5619 | 31 | 0.1224   |
| 316 | E | K | E316K | benign     | Y | Y | 3.98E-06 | benign            | 0.135 | BENIGN     | 0.670 | 0.690 | -0.6663 | 0.8476 | 31 | 0.1224   |
| 317 | H | R | H317R | pathogenic | Y |   |          | probably damaging | 0.958 | PATHOGENIC | 0.020 | 0.947 | 0.9688  | 0.8820 | 31 | 0.0064   |
| 317 | H | Y | H317Y | pathogenic | Y |   |          | possibly damaging | 0.872 | PATHOGENIC | 0.010 | 0.956 | -1.2610 | 1.1099 | 31 | 0.0064   |
| 320 | P | L | P320L | pathogenic | Y |   |          | probably damaging | 1.000 | PATHOGENIC | 0.000 | 0.959 | 4.5393  | 0.9875 | 31 | 0.0261   |
| 320 | P | R | P320R | pathogenic | Y |   |          | probably damaging | 1.000 | PATHOGENIC | 0.000 | 0.958 | 11.4020 | 3.2030 | 31 | 0.0261   |
| 325 | A | P | A325P | pathogenic | Y |   |          | possibly damaging | 0.897 | PATHOGENIC | 0.020 | 0.910 | 7.9524  | 0.5275 | 31 | 0.0000   |
| 330 | R | H | R330H | benign     | Y | Y | 3.19E-05 | probably damaging | 0.999 | PATHOGENIC | 0.000 | 0.923 | 0.4408  | 0.2214 | 31 | Y 0.4254 |
| 335 | R | Q | R335Q | benign     | Y | Y | 3.98E-06 | possibly damaging | 0.642 | BENIGN     | 0.240 | 0.531 | 0.3039  | 0.3378 | 31 | 0.3519   |
| 337 | A | D | A337D | pathogenic | Y |   |          | probably damaging | 0.999 | PATHOGENIC | 0.000 | 0.948 | 8.8807  | 1.3733 | 31 | 0.0000   |
| 337 | A | P | A337P | pathogenic | Y |   |          | probably damaging | 0.999 | PATHOGENIC | 0.000 | 0.952 | 8.5759  | 0.8298 | 31 | 0.0000   |
| 338 | L | P | L338P | pathogenic | Y |   |          | probably damaging | 0.929 | PATHOGENIC | 0.010 | 0.937 | 6.6133  | 0.5421 | 31 | 0.0227   |
| 338 | L | V | L338V | benign     | Y | Y | 1.99E-05 | benign            | 0.384 | BENIGN     | 0.090 | 0.795 | 2.9960  | 0.3553 | 31 | 0.0227   |
| 341 | W | R | W341R | pathogenic | Y |   |          | probably damaging | 0.999 | PATHOGENIC | 0.000 | 0.935 | 4.1895  | 0.6008 | 31 | Y 0.0326 |
| 342 | A | P | A342P | pathogenic | Y |   |          | probably damaging | 0.988 | PATHOGENIC | 0.000 | 0.955 | 6.3422  | 0.5649 | 31 | 0.0011   |
| 342 | A | T | A342T | benign     | Y | Y | 3.98E-06 | probably damaging | 0.943 | PATHOGENIC | 0.000 | 0.891 | 4.7506  | 1.3042 | 31 | 0.0011   |
| 342 | A | V | A342V | benign     | Y | Y | 7.95E-06 | possibly damaging | 0.605 | PATHOGENIC | 0.000 | 0.865 | 5.5973  | 1.4952 | 31 | 0.0011   |
| 344 | T | M | T344M | benign     | Y | Y | 3.98E-06 | possibly damaging | 0.902 | PATHOGENIC | 0.010 | 0.733 | 0.8694  | 1.6832 | 31 | 0.0000   |
| 344 | T | R | T344R | pathogenic | Y |   |          | possibly damaging | 0.822 | PATHOGENIC | 0.010 | 0.812 | 5.1084  | 3.2709 | 31 | 0.0000   |
| 348 | I | N | I348N | pathogenic | Y |   |          | probably damaging | 0.952 | PATHOGENIC | 0.000 | 0.867 | 4.2577  | 0.4717 | 31 | 0.0000   |
| 350 | D | V | D350V | pathogenic | Y |   |          | benign            | 0.129 | BENIGN     | 0.260 | 0.688 | 0.1842  | 0.4611 | 31 | 0.3745   |
| 351 | Y | H | Y351H | pathogenic | Y |   |          | probably damaging | 0.994 | PATHOGENIC | 0.000 | 0.962 | 3.0878  | 0.2902 | 31 | 0.0043   |
| 351 | Y | N | Y351N | pathogenic | Y |   |          | probably damaging | 0.994 | PATHOGENIC | 0.000 | 0.944 | 3.9461  | 0.4693 | 31 | 0.0043   |
| 353 | Y | D | Y353D | pathogenic | Y |   |          | probably damaging | 0.988 | PATHOGENIC | 0.000 | 0.942 | 5.4037  | 0.5484 | 31 | 0.0744   |
| 354 | C | R | C354R | benign     | Y | Y | 3.98E-06 | benign            | 0.331 | BENIGN     | 0.150 | 0.661 | -0.4974 | 0.5042 | 31 | 0.0359   |
| 355 | R | W | R355W | pathogenic | Y |   |          | probably damaging | 0.989 | PATHOGENIC | 0.000 | 0.937 | 0.0721  | 0.3291 | 31 | 0.6726   |
| 356 | E | D | E356D | benign     | Y | Y | 3.98E-06 | benign            | 0.044 | BENIGN     | 0.830 | 0.524 | 0.9321  | 0.8629 | 31 | 0.2172   |
| 357 | D | H | D357H | pathogenic | Y |   |          | probably damaging | 0.999 | PATHOGENIC | 0.000 | 0.908 | 16.7655 | 2.7987 | 31 | 0.0007   |
| 357 | D | N | D357N | benign     | Y | Y | 3.98E-06 | probably damaging | 0.997 | PATHOGENIC | 0.000 | 0.797 | 3.2138  | 0.8205 | 31 | 0.0007   |
| 364 | F | C | F364C | pathogenic | Y |   |          | probably damaging | 0.946 | PATHOGENIC | 0.000 | 0.966 | 4.2783  | 0.3465 | 31 | 0.0012   |
| 366 | E | D | E366D | uncertain  | Y | Y | 7.16E-05 | benign            | 0.044 | BENIGN     | 0.800 | 0.611 | 0.6620  | 0.1874 | 31 | Y 0.4356 |
| 367 | V | I | V367I | benign     | Y | Y | 1.27E-04 | benign            | 0.057 | BENIGN     | 1.000 | 0.422 | -0.6475 | 0.2535 | 31 | 0.0411   |
| 367 | V | L | V367L | benign     | Y | Y | 7.96E-06 | benign            | 0.280 | PATHOGENIC | 0.020 | 0.604 | 0.7840  | 0.9305 | 31 | 0.0411   |
| 368 | A | D | A368D | pathogenic | Y |   |          | probably damaging | 0.987 | PATHOGENIC | 0.000 | 0.961 | 3.2704  | 1.2425 | 31 | 0.0000   |
| 372 | I | M | I372M | pathogenic | Y |   |          | possibly damaging | 0.779 | PATHOGENIC | 0.010 | 0.837 | -0.0463 | 0.2576 | 31 | 0.0094   |
| 373 | P | A | P373A | pathogenic | Y |   |          | probably damaging | 0.997 | PATHOGENIC | 0.000 | 0.959 | 3.0938  | 0.2602 | 31 | 0.0512   |
| 373 | P | L | P373L | pathogenic | Y |   |          | probably damaging | 0.998 | PATHOGENIC | 0.000 | 0.958 | 1.9255  | 0.4669 | 31 | 0.0512   |
| 373 | P | S | P373S | pathogenic | Y |   |          | probably damaging | 0.998 | PATHOGENIC | 0.000 | 0.972 | 3.9140  | 0.3660 | 31 | 0.0512   |
| 374 | N | S | N374S | benign     | Y | Y | 3.98E-06 | benign            | 0.059 | BENIGN     | 0.380 | 0.468 | 0.4952  | 0.2448 | 31 | 0.4637   |
| 374 | N | T | N374T | benign     | Y | Y | 2.12E-05 | benign            | 0.059 | BENIGN     | 0.500 | 0.459 | 0.8145  | 0.3527 | 31 | 0.4637   |
| 375 | L | P | L375P | pathogenic | Y |   |          | possibly damaging | 0.683 | PATHOGENIC | 0.020 | 0.910 | 5.5098  | 1.1145 | 31 | Y 0.0455 |
| 375 | L | V | L375V | benign     | Y | Y | 3.98E-06 | benign            | 0.016 | BENIGN     | 1.000 | 0.528 | 1.9319  | 0.3863 | 31 | 0.0455   |
| 376 | L | P | L376P | pathogenic | Y |   |          | probably damaging | 0.952 | PATHOGENIC | 0.010 | 0.940 | 6.7157  | 0.6123 | 31 | 0.0085   |
| 377 | K | R | K377R | benign     | Y | Y | 3.98E-06 | benign            | 0.262 | BENIGN     | 0.170 | 0.787 | 0.0647  | 0.2166 | 31 | 0.4728   |
| 380 | A | T | A380T | benign     | Y | Y | 7.95E-06 | benign            | 0.067 | BENIGN     | 0.430 | 0.437 | 0.9858  | 0.4990 | 31 | 0.1561   |
| 381 | S | G | S381G | benign     | Y | Y | 3.98E-06 | possibly damaging | 0.730 | BENIGN     | 0.050 | 0.444 | 0.6972  | 0.2501 | 31 | 0.4488   |
| 385 | A | V | A385V | uncertain  | Y | Y | 3.98E-06 | benign            | 0.024 | BENIGN     | 0.210 | 0.608 | 0.8026  | 0.3563 | 31 | 0.7300   |
| 386 | G | D | G386D | benign     | Y | Y | 1.19E-05 | benign            | 0.081 | BENIGN     | 0.210 | 0.434 | 1.9634  | 0.2748 | 24 | 0.7524   |
| 399 | S | N | S399N | benign     | Y | Y | 3.99E-06 | benign            | 0.000 | BENIGN     | 0.230 | 0.358 | -0.8044 | 0.1721 | 23 | 0.2742   |
| 401 | G | D | G401D | benign     | Y | Y | 3.99E-06 | possibly damaging | 0.653 | BENIGN     | 0.620 | 0.588 | 1.4955  | 0.4410 | 24 | 0.5513   |
| 403 | A | T | A403T | benign     | Y | Y | 7.98E-06 | possibly damaging | 0.541 | BENIGN     | 0.130 | 0.729 | 1.6106  | 0.8856 | 31 | 0.0866   |
| 411 | A | P | A411P | pathogenic | Y |   |          | probably damaging | 0.990 | PATHOGENIC | 0.010 | 0.922 | 6.2657  | 1.1989 | 31 | 0.0476   |
| 411 | A | T | A411T | benign     | Y | Y | 3.98E-06 | probably damaging | 0.973 | PATHOGENIC | 0.010 | 0.870 | 0.7892  | 0.4894 | 31 | 0.0476   |
| 413 | L | P | L413P | pathogenic | Y |   |          | probably damaging | 0.965 | PATHOGENIC | 0.000 | 0.944 | 7.0953  | 0.7535 | 31 | 0.0036   |
| 413 | L | R | L413R | pathogenic | Y |   |          | probably damaging | 0.965 | PATHOGENIC | 0.000 | 0.950 | 2.7864  | 0.8182 | 31 | 0.0036   |
| 414 | L | P | L414P | pathogenic | Y |   |          | probably damaging | 0.998 | PATHOGENIC | 0.000 | 0.918 | 7.7383  | 0.6482 | 31 | 0.0021   |
| 414 | L | Q | L414Q | pathogenic | Y |   |          | probably damaging | 0.998 | PATHOGENIC | 0.000 | 0.934 | 4.0294  | 0.3152 | 31 | 0.0021   |



|     |   |   |       |            |   |   |          |                   |       |            |       |       |         |        |    |        |
|-----|---|---|-------|------------|---|---|----------|-------------------|-------|------------|-------|-------|---------|--------|----|--------|
| 415 | R | P | R415P | pathogenic | Y |   |          | probably damaging | 0.942 | PATHOGENIC | 0.010 | 0.912 | 6.3502  | 1.1223 | 31 | 0.2138 |
| 415 | R | Q | R415Q | benign     | Y | Y | 3.98E-06 | benign            | 0.139 | BENIGN     | 0.110 | 0.757 | 1.1921  | 0.3848 | 31 | 0.2138 |
| 418 | D | N | D418N | pathogenic | Y |   |          | probably damaging | 1.000 | PATHOGENIC | 0.000 | 0.891 | 2.5381  | 0.8784 | 31 | 0.0215 |
| 420 | I | N | I420N | pathogenic | Y |   |          | probably damaging | 0.986 | PATHOGENIC | 0.000 | 0.921 | 3.3948  | 0.3424 | 31 | 0.0015 |
| 421 | C | Y | C421Y | pathogenic | Y |   |          | probably damaging | 0.999 | PATHOGENIC | 0.000 | 0.952 | 7.0866  | 2.9568 | 31 | 0.0077 |
| 423 | W | R | W423R | pathogenic | Y |   |          | probably damaging | 0.999 | PATHOGENIC | 0.000 | 0.945 | 4.1542  | 0.5664 | 31 | 0.0000 |
| 423 | W | S | W423S | pathogenic | Y |   |          | probably damaging | 0.999 | PATHOGENIC | 0.000 | 0.925 | 6.5756  | 0.5713 | 31 | 0.0000 |
| 427 | S | I | S427I | pathogenic | Y |   |          | probably damaging | 0.972 | PATHOGENIC | 0.000 | 0.960 | 6.7257  | 1.2151 | 31 | 0.1392 |
| 427 | S | R | S427R | pathogenic | Y |   |          | probably damaging | 0.981 | PATHOGENIC | 0.010 | 0.867 | 9.6584  | 2.7474 | 31 | 0.1392 |
| 429 | T | M | T429M | benign     | Y | Y | 3.98E-06 | probably damaging | 0.999 | PATHOGENIC | 0.000 | 0.951 | -0.7217 | 0.4454 | 31 | 0.3164 |
| 434 | V | M | V434M | benign     | Y | Y | 3.98E-06 | probably damaging | 0.929 | PATHOGENIC | 0.010 | 0.830 | -0.9110 | 0.3113 | 31 | 0.5427 |
| 436 | W | C | W436C | pathogenic | Y |   |          | probably damaging | 0.999 | PATHOGENIC | 0.000 | 0.932 | 4.9191  | 0.4623 | 31 | 0.0000 |
| 436 | W | R | W436R | pathogenic | Y |   |          | probably damaging | 0.999 | PATHOGENIC | 0.000 | 0.933 | 5.3112  | 0.5725 | 31 | 0.0000 |
| 443 | S | P | S443P | benign     | Y | Y | 3.98E-06 | probably damaging | 0.930 | PATHOGENIC | 0.010 | 0.907 | 3.8273  | 0.8430 | 31 | 0.0037 |
| 443 | S | Y | S443Y | pathogenic | Y |   |          | probably damaging | 0.952 | PATHOGENIC | 0.000 | 0.938 | 12.3672 | 2.3746 | 31 | 0.0037 |
| 444 | L | P | L444P | pathogenic | Y |   |          | probably damaging | 0.929 | PATHOGENIC | 0.000 | 0.967 | 7.1602  | 0.7193 | 31 | 0.0000 |
| 447 | F | L | F447L | pathogenic | Y |   |          | probably damaging | 0.998 | PATHOGENIC | 0.000 | 0.945 | 2.3714  | 0.5948 | 31 | 0.0125 |
| 447 | F | S | F447S | pathogenic | Y |   |          | probably damaging | 0.999 | PATHOGENIC | 0.000 | 0.927 | 4.7555  | 0.3058 | 31 | 0.0125 |
| 448 | E | A | E448A | benign     | Y | Y | 3.99E-06 | benign            | 0.016 | PATHOGENIC | 0.010 | 0.601 | 1.8534  | 0.7884 | 31 | 0.5426 |
| 451 | V | E | V451E | benign     | Y | Y | 4.37E-06 | possibly damaging | 0.865 | PATHOGENIC | 0.000 | 0.940 | 2.0544  | 0.4323 | 31 | 0.0443 |
| 452 | R | Q | R452Q | benign     | Y | Y | 8.74E-06 | probably damaging | 0.999 | PATHOGENIC | 0.000 | 0.932 | 4.3475  | 1.1805 | 31 | 0.0266 |
| 452 | R | W | R452W | pathogenic | Y |   |          | probably damaging | 1.000 | PATHOGENIC | 0.000 | 0.961 | 24.8968 | 2.8975 | 31 | 0.0266 |
| 455 | V | G | V455G | benign     | Y | Y | 4.38E-06 | probably damaging | 0.929 | PATHOGENIC | 0.000 | 0.944 | 4.0447  | 0.3325 | 31 | 0.0443 |
| 456 | R | C | R456C | benign     | Y | Y | 1.16E-05 | benign            | 0.340 | BENIGN     | 0.060 | 0.477 | 0.4542  | 0.1573 | 31 | 0.5339 |
| 456 | R | H | R456H | benign     | Y | Y | 4.38E-06 | benign            | 0.001 | BENIGN     | 0.130 | 0.358 | 0.6709  | 0.1510 | 31 | 0.5339 |
| 457 | I | T | I457T | benign     | Y | Y | 4.38E-06 | possibly damaging | 0.844 | PATHOGENIC | 0.000 | 0.883 | 2.7840  | 0.3016 | 31 | 0.1385 |
| 458 | V | A | V458A | benign     | Y | Y | 4.39E-06 | benign            | 0.058 | BENIGN     | 0.760 | 0.487 | 0.5864  | 0.5185 | 31 | 0.2578 |
| 520 | G | R | G520R | benign     | Y | Y | 3.19E-05 | benign            | 0.001 | BENIGN     | 0.470 | 0.400 | 0.8000  | 0.7326 | 5  | 0.6154 |
| 523 | A | P | A523P | benign     | Y | Y | 1.22E-05 | benign            | 0.000 | BENIGN     | 0.280 | 0.282 | -0.3561 | 0.1075 | 5  | 0.7416 |
| 523 | A | T | A523T | benign     | Y | Y | 2.16E-05 | benign            | 0.002 | BENIGN     | 0.620 | 0.258 | -0.0516 | 0.3239 | 5  | 0.7416 |
| 524 | G | S | G524S | benign     | Y | Y | 4.05E-06 | benign            | 0.001 | BENIGN     | 0.540 | 0.254 | 3.4229  | 0.5713 | 5  | 0.5897 |
| 525 | T | I | T525I | benign     | Y | Y | 4.04E-06 | benign            | 0.006 | BENIGN     | 0.240 | 0.296 | 0.1707  | 0.3734 | 5  | 0.7519 |
| 526 | A | T | A526T | benign     | Y | Y | 4.03E-06 | benign            | 0.001 | BENIGN     | 0.320 | 0.244 | 0.1557  | 1.0816 | 5  | 0.6408 |
| 527 | R | Q | R527Q | benign     | Y | Y | 4.02E-06 | benign            | 0.001 | BENIGN     | 0.480 | 0.349 | 0.5328  | 0.8541 | 5  | 0.9051 |
| 534 | T | M | T534M | benign     | Y | Y | 4.00E-06 | benign            | 0.058 | PATHOGENIC | 0.050 | 0.354 | -0.4702 | 0.0000 | 1  | 0.6977 |
| 536 | Q | R | Q536R | benign     | Y | Y | 3.99E-06 | benign            | 0.012 | BENIGN     | 0.520 | 0.398 | -0.1550 | 0.0000 | 1  | 0.5289 |
| 537 | V | G | V537G | benign     | Y | Y | 3.99E-06 | benign            | 0.000 | PATHOGENIC | 0.020 | 0.344 | 0.8241  | 0.0000 | 1  | 0.6724 |
| 537 | V | L | V537L | benign     | Y | Y | 3.99E-06 | benign            | 0.000 | BENIGN     | 0.490 | 0.346 | -0.3012 | 0.0000 | 1  | 0.6724 |
| 544 | P | S | P544S | uncertain  | Y | Y | 3.98E-06 | benign            | 0.395 | BENIGN     | 0.310 | 0.696 | 0.2736  | 0.0000 | 1  | 0.9434 |
| 546 | P | Q | P546Q | benign     | Y | Y | 3.98E-06 | benign            | 0.010 | BENIGN     | 0.360 | 0.360 | 0.8759  | 0.0000 | 1  | 0.3396 |
| 547 | E | G | E547G | benign     | Y | Y | 1.06E-05 | benign            | 0.001 | BENIGN     | 0.290 | 0.470 | 0.1271  | 0.0042 | 2  | 0.8072 |
| 550 | V | L | V550L | uncertain  | Y | Y | 1.19E-05 | benign            | 0.071 | BENIGN     | 0.350 | 0.708 | -0.5712 | 0.2827 | 31 | 0.5246 |
| 552 | T | S | T552S | pathogenic | Y |   |          | benign            | 0.017 | BENIGN     | 0.640 | 0.417 | 0.4612  | 0.2239 | 31 | 0.3530 |
| 555 | S | N | S555N | pathogenic | Y |   |          | probably damaging | 0.969 | PATHOGENIC | 0.000 | 0.747 | 6.7505  | 1.7890 | 31 | 0.0000 |
| 555 | S | R | S555R | pathogenic | Y |   |          | probably damaging | 0.986 | PATHOGENIC | 0.000 | 0.878 | 7.8921  | 2.4523 | 31 | 0.0000 |
| 557 | K | E | K557E | pathogenic | Y |   |          | probably damaging | 0.981 | PATHOGENIC | 0.000 | 0.879 | 3.5375  | 0.6159 | 31 | 0.1416 |
| 558 | M | K | M558K | pathogenic | Y |   |          | probably damaging | 0.923 | PATHOGENIC | 0.000 | 0.945 | 3.3583  | 0.3057 | 31 | 0.0019 |
| 561 | M | K | M561K | pathogenic | Y |   |          | probably damaging | 0.923 | PATHOGENIC | 0.000 | 0.916 | 3.3142  | 0.7366 | 31 | 0.0000 |
| 561 | M | R | M561R | pathogenic | Y |   |          | probably damaging | 0.944 | PATHOGENIC | 0.000 | 0.920 | 6.1973  | 1.3920 | 31 | 0.0000 |
| 568 | T | I | T568I | benign     | Y | Y | 7.96E-06 | benign            | 0.217 | BENIGN     | 0.100 | 0.524 | -0.2177 | 0.1399 | 31 | 0.6254 |
| 573 | S | N | S573N | benign     | Y | Y | 3.98E-06 | probably damaging | 0.969 | BENIGN     | 0.930 | 0.642 | 0.4434  | 0.2037 | 31 | 0.5041 |
| 577 | L | P | L577P | pathogenic | Y |   |          | probably damaging | 0.997 | PATHOGENIC | 0.000 | 0.954 | 3.2416  | 0.9816 | 31 | 0.5458 |
| 579 | L | F | L579F | benign     | Y | Y | 3.98E-06 | probably damaging | 0.994 | PATHOGENIC | 0.020 | 0.798 | 4.7813  | 2.7921 | 31 | 0.0021 |
| 579 | L | P | L579P | pathogenic | Y |   |          | probably damaging | 0.997 | PATHOGENIC | 0.000 | 0.979 | 8.2627  | 1.0957 | 31 | 0.0021 |
| 583 | S | P | S583P | pathogenic | Y |   |          | probably damaging | 0.986 | PATHOGENIC | 0.000 | 0.963 | -0.4088 | 0.9754 | 24 | 0.8548 |
| 597 | D | A | D597A | benign     | Y |   |          | probably damaging | 0.994 | PATHOGENIC | 0.030 | 0.827 | 1.2074  | 0.0000 | 1  | 0.6425 |

# Caswell et al Figure 1

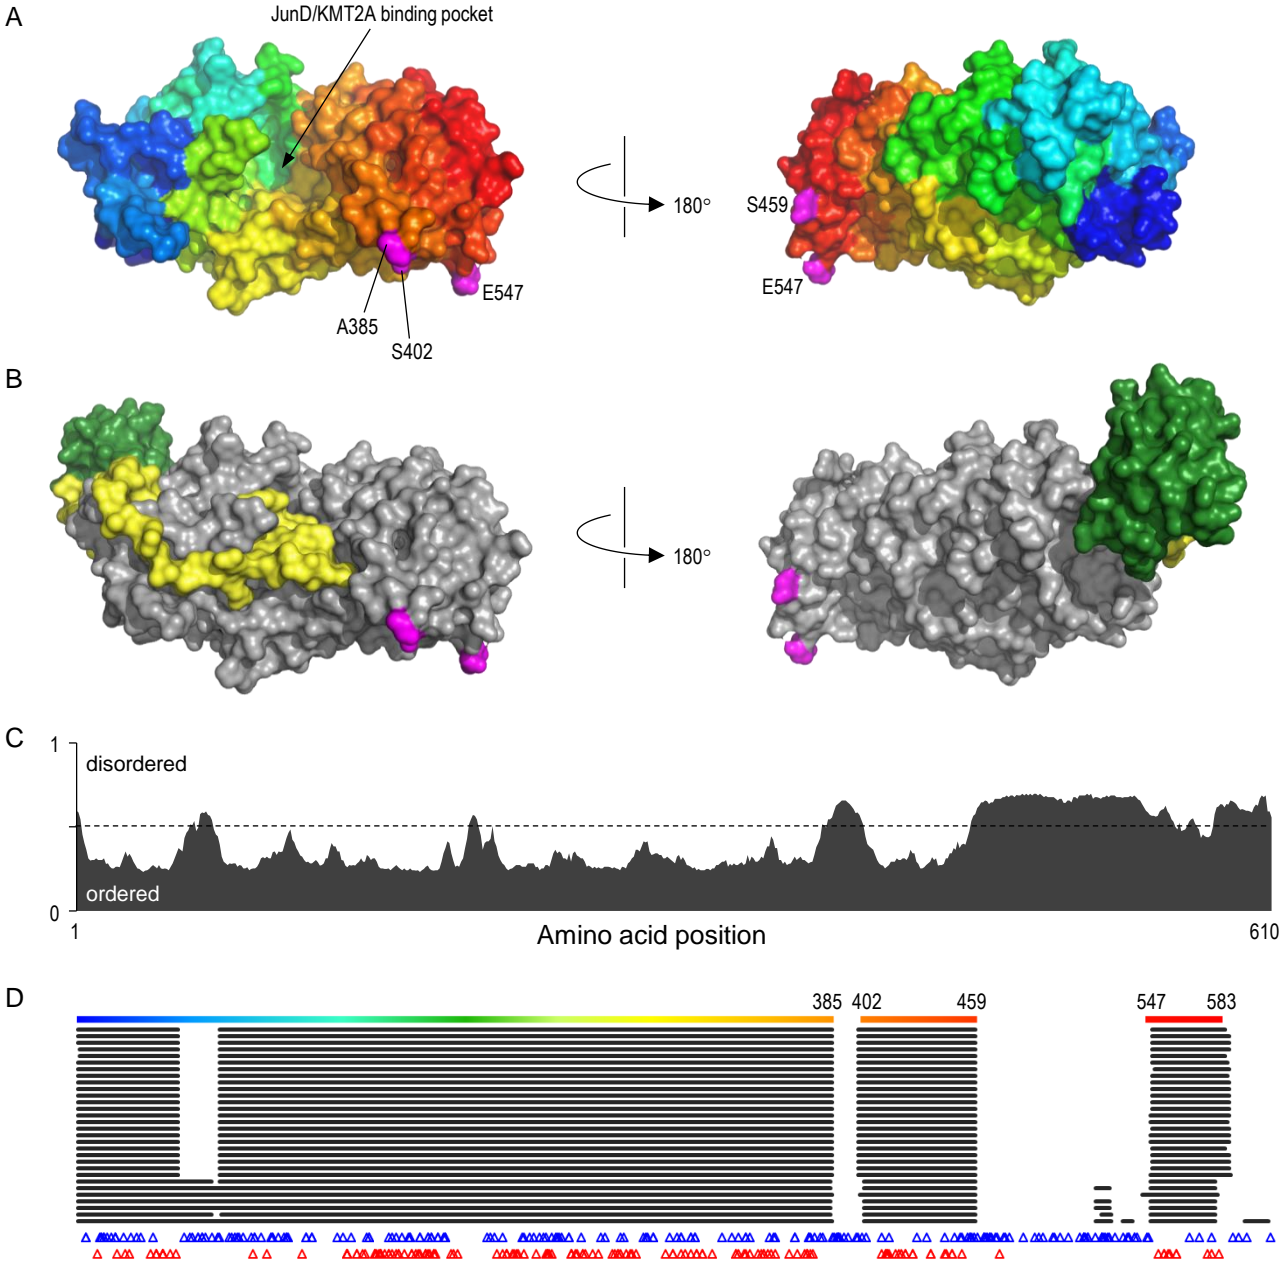

# Caswell et al Figure 2

A

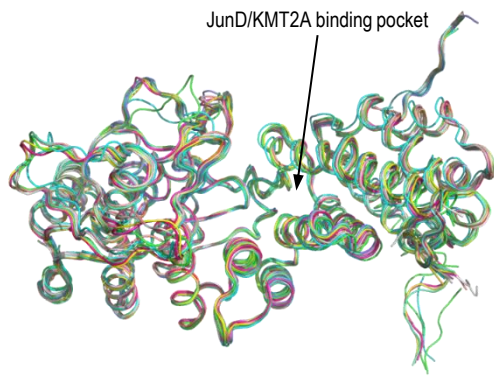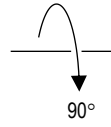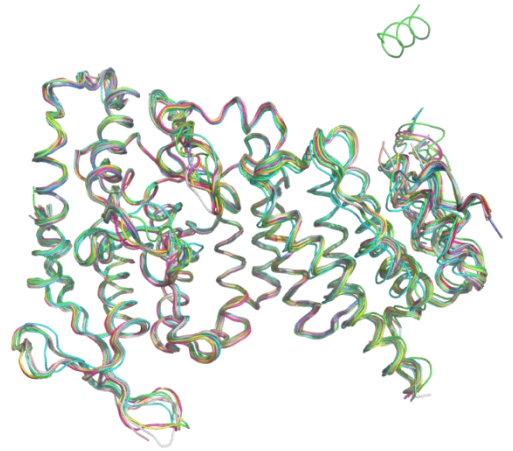

B

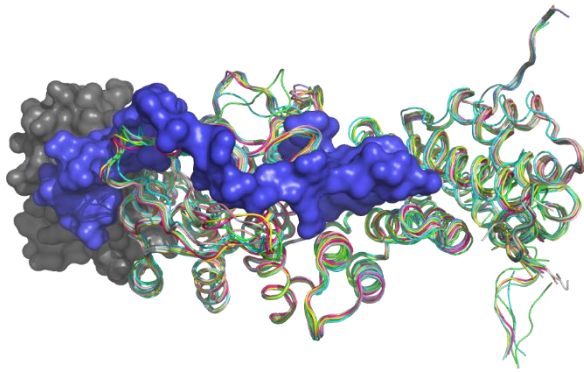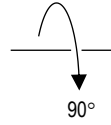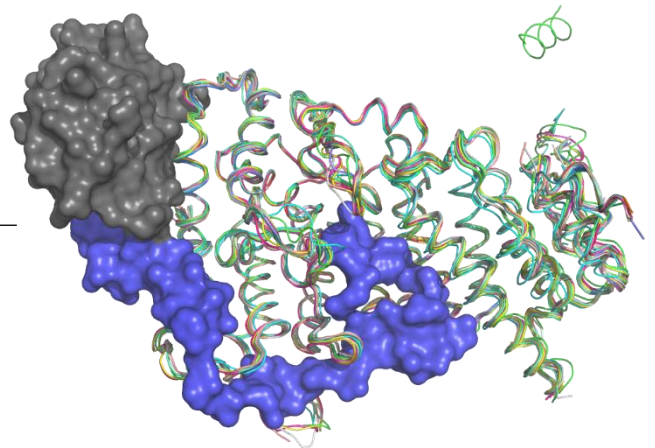

# Caswell et al Figure 3

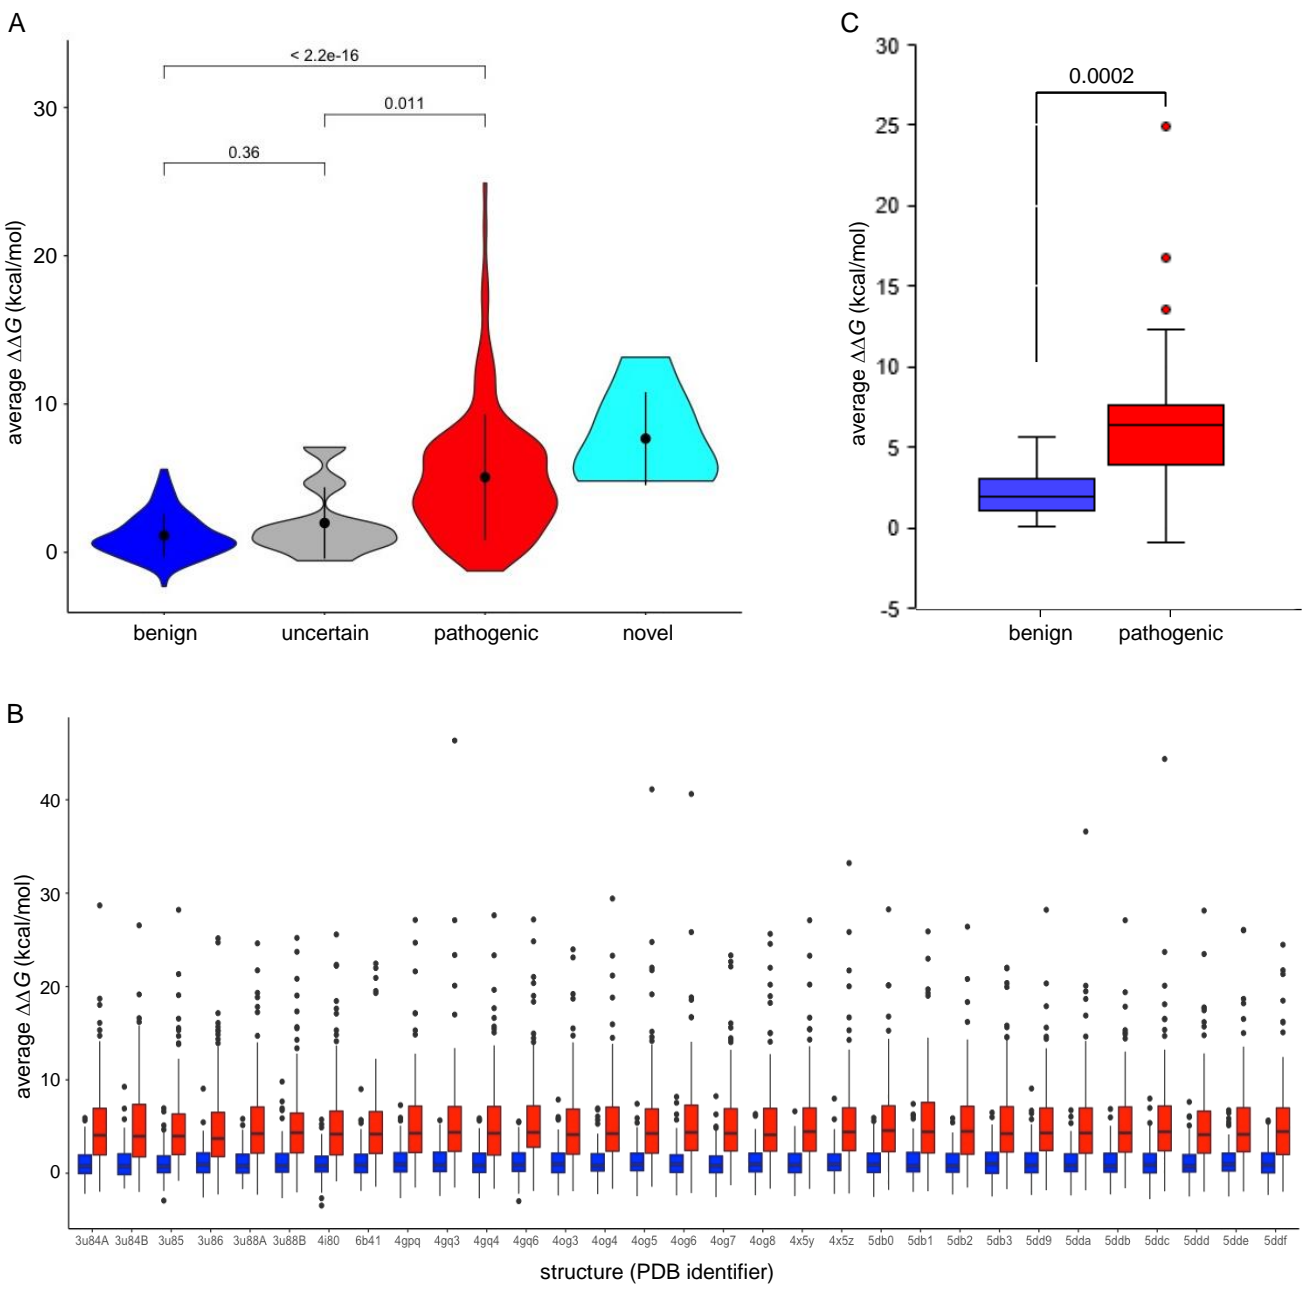

Caswell et al Figure 4

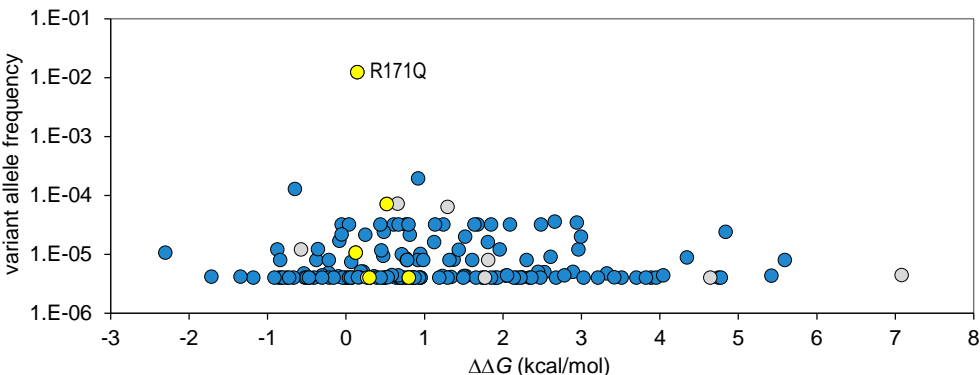

# Caswell et al Figure 5

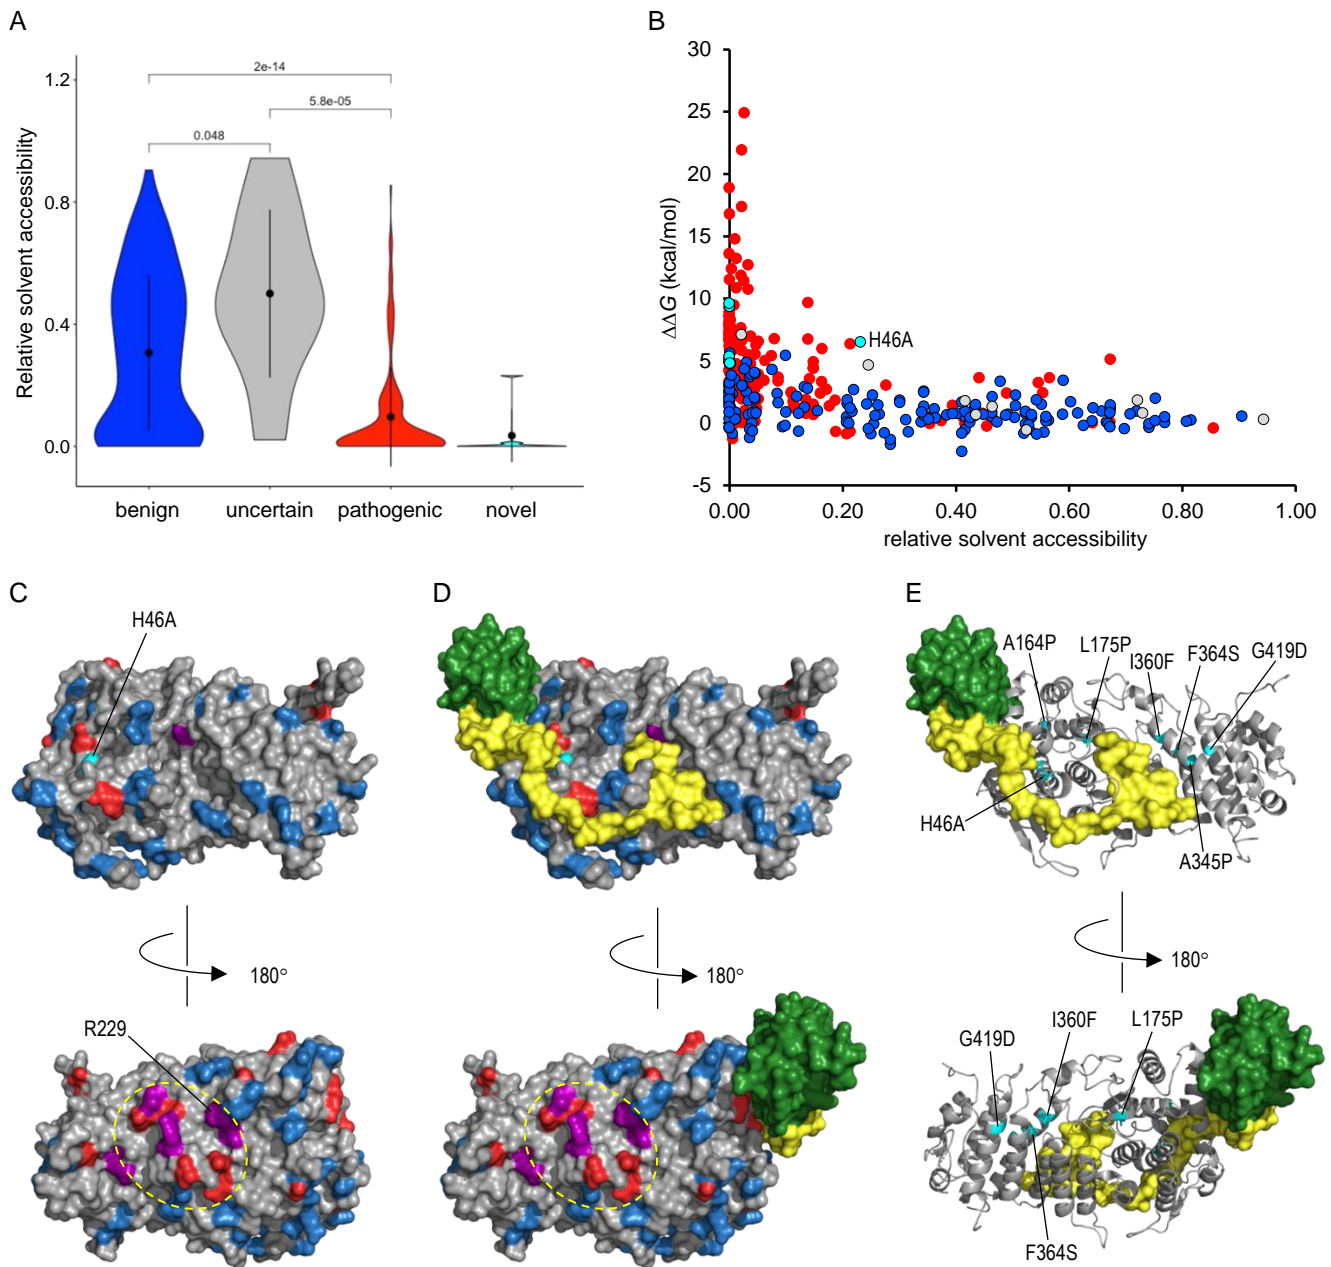

Caswell et al Figure 6

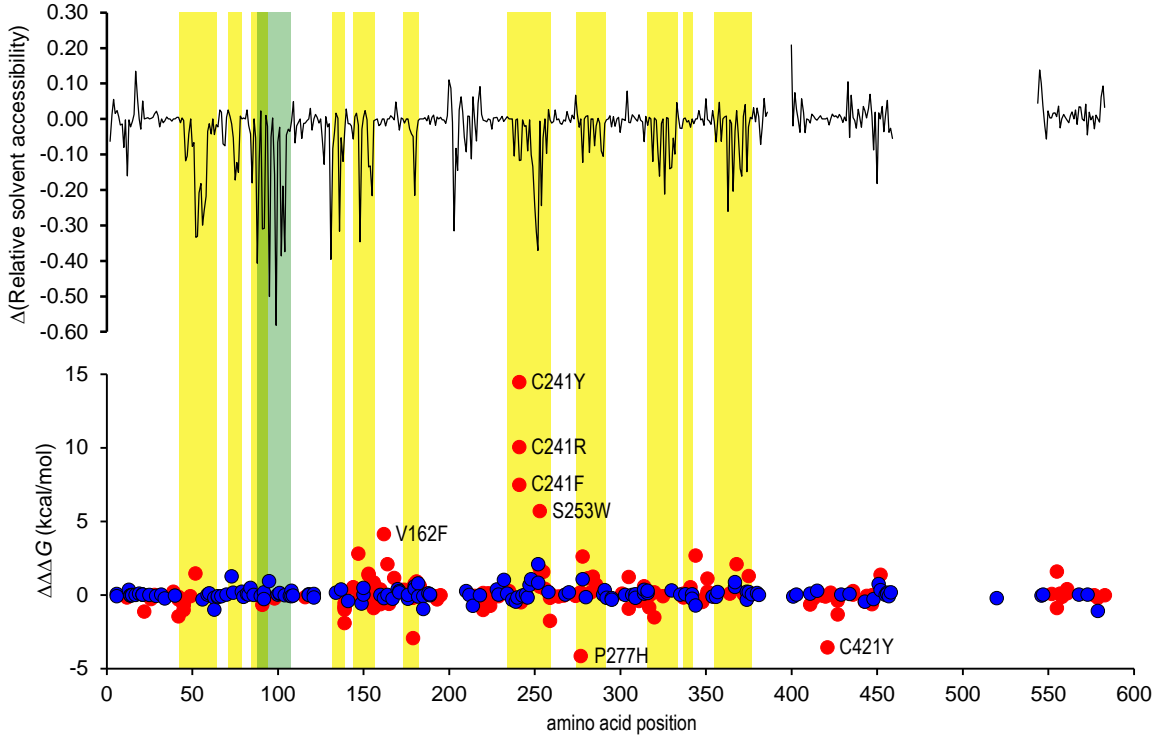

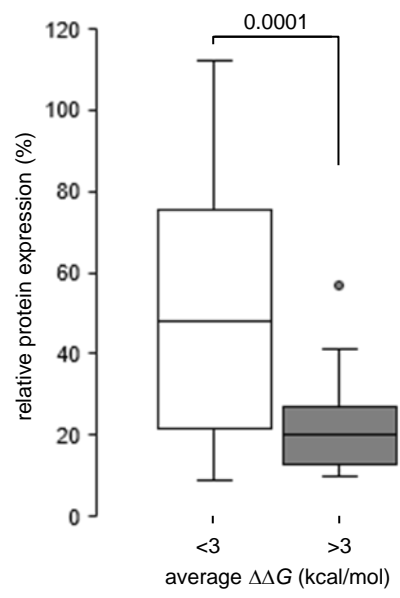



# Caswell et al Figure 8

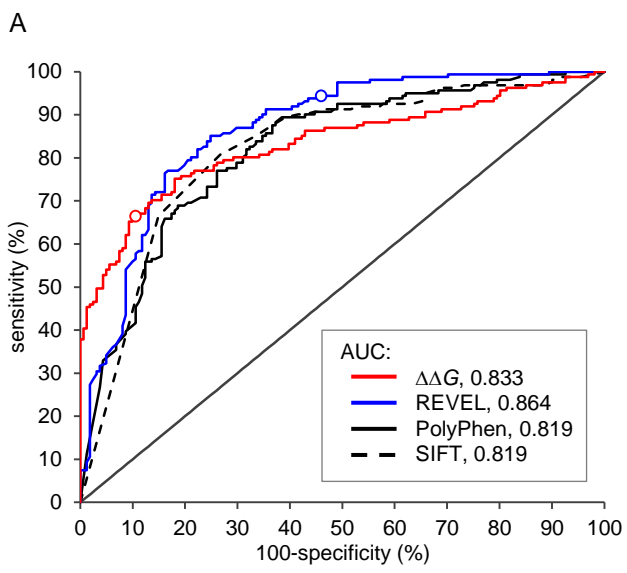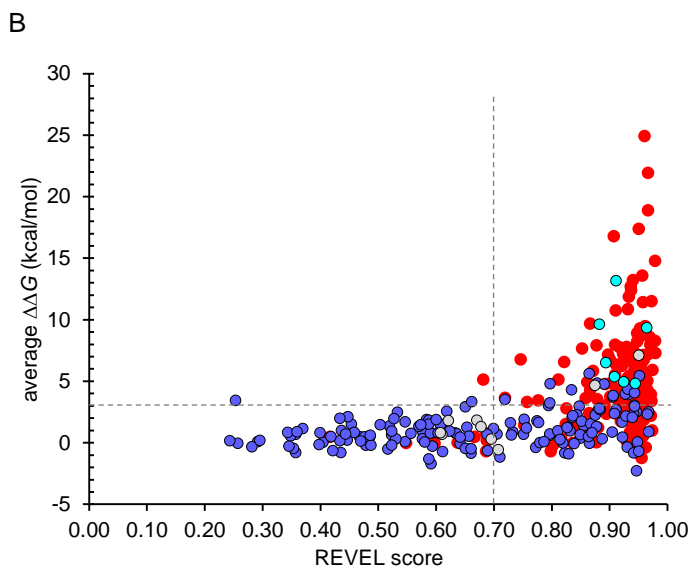

Source: https://www.biorxiv.org/content/10.1101/661512v3.full.pdf
